# Supplementary material
Source: PubMed Central journal article supplement (PMC2889495)

## Supplementary Table 1.

### Primers used for amplification of HCV E2 region

| Sequence (5' – 3') <sup>1</sup>                         | Use                                                      |
|---------------------------------------------------------|----------------------------------------------------------|
| Genotype 1a/1b/3a                                       |                                                          |
| GCAACAGGGAACCTTCCTGGTTGCTC                              | outer fwd PCR primer, low viral load                     |
| Genotype 1a/1b                                          |                                                          |
| CCGGTTCATCCAYTGC                                        | Reverse transcription (RT), high viral load <sup>2</sup> |
| GCADBTGCGCYTCBRCYCTGGT                                  | RT, low viral load <sup>3</sup>                          |
| ACTGTCTTCACGCAGAAAGCGTCTAGC                             | outer fwd PCR primer, high viral load                    |
| CTCCAGGTCRCCGACATGCA                                    | outer rev PCR primer, high viral load                    |
| GGGGACAAGTTTGTACAAAAAAGCAGGCTTCACCATGGGTTGCTCTTTCTCTATC | inner fwd PCR primer, high viral load                    |
| Genotype 1a                                             |                                                          |
| CGCCTCCGCTTGGGATATGAG                                   | outer rev PCR primer, low viral load                     |
| GGGGACAAGTTTGTACAAAAAAGCAGGCTTCACCATGTGGGGGTCCTGGCGGGC  | inner fwd PCR primer, low viral load                     |
| GGGGACCACTTTGTACAAGAAAGCTGGGTCCTACGCCTCCGCTTGGGATATGAG  | inner rev PCR primer, high and low viral load            |
| Genotype 1b                                             |                                                          |
| GGCCTCRGCTYGRGCTATYAG                                   | outer rev PCR primer, low viral load                     |
| GGGGACAAGTTTGTACAAAAAAGCAGGCTTCACCATGTGGGGAGTCCTAGCGGGC | inner fwd PCR primer, low viral load                     |
| GGGGACCACTTTGTACAAGAAAGCTGGGTCCTAGGCCTCRGCTYGRGCTATYAG  | inner rev PCR primer, low viral load                     |
| Genotype 3a                                             |                                                          |
| GYCTGTTTCATCCACTG                                       | RT, high viral load                                      |
| TGCTTCTGCGTGTGATATCAT                                   | RT, low viral load                                       |
| TCTGTCTTCACGCGGAAAGCGYCTAGC                             | outer fwd PCR primer, high viral load                    |
| TTCCAGATCRGCTGACATGCA                                   | outer rev PCR primer, high viral load                    |
| GGGGACAAGTTTGTACAAAAAAGCAGGCTTCACCATGGGTTGCTCCTTTTCTAT  | inner fwd PCR primer, high viral load                    |
| GGGGACCACTTTGTACAAGAAAGCTGGGTCCTATGCTTCTGCGTGTGATATCAT  | inner rev PCR primer, high and low viral load            |
| TGCTTCTGCGTGTGATATCAT                                   | outer rev PCR primer, low viral load                     |
| GGGGACAAGTTTGTACAAAAAAGCAGGCTTCACCATGTGGGGGTCCTGGCGGGC  | inner fwd PCR primer, low viral load                     |

<sup>1</sup> Outer primers were designed to include Gateway Cloning (Invitrogen) attb1 and attb2 sequences for recombination into destination vectors, a Kozak sequence and ATG codon, and a stop codon after the last amino acid in E2 for future expression in eukaryotic cells.

<sup>2</sup> viral load of plasma sample greater than 3,000 IU/ml

<sup>3</sup> viral load of plasma sample less than 3,000 IU/ml

Supplementary Table 2. Sequences of peptides recognized by initial and new T cell responses.

**Reinfected Subjects**

**Reinfection outcome: Cleared**

| Subject 57               |                      |
|--------------------------|----------------------|
| Initial T cell responses | New T cell responses |
| KLVALGINAV               | DYPYRLWHY            |
| CINGVCWTV                | DLMGYIPLV            |
| VLSDFKTWL                | AASLAGTHGLVSFLVF     |
| RLWHYPCTV                | RDAVILLMCVVHPTLV     |
| GPRLGVRAT                | GRHLIFCHSKKKCDEL     |
| YYRGLDVSVI               | NTCVTQTVDFSLDPTF     |
| TDFAQGWGPISYANGSGL       | ETTVRLRAYMNTPLG      |
| GLIHLHQNIVDVQYLY         | GENFPYLVAYQATVCA     |
| LQYFLTRVEAQLHVWV         | QWMNRLIAFASRGNHV     |
|                          | WLKAKLMPQLPGIPFV     |
|                          | INALSNLLRHHNLVY      |
|                          | STTSRSACQRQKKVTF     |

  

| Subject 133              |                      |
|--------------------------|----------------------|
| Initial T cell responses | New T cell responses |
| TPMGFSYDTRCFDSTV         | ADTAACGDIINGLPV      |
| YPPKPCGI                 | HPNIEEVAL            |
|                          | LVAYQATVCARAQA       |
|                          | EPDVAVLTSMLTDPSH     |
|                          | VESENKVVILDSFDPL     |
|                          | ILRKSRRFARALPVWA     |
|                          | LPLAVMGSSYGFQY       |

  

| Subject 180              |                      |
|--------------------------|----------------------|
| Initial T cell responses | New T cell responses |
| ALYDVVTKL                | AEEYVEIRRVGDFHYV     |
|                          | GKYLFNWAVRCLKL       |

**Reinfection outcome: Persistent**

| Subject 18               |                      |
|--------------------------|----------------------|
| Initial T cell responses | New T cell responses |
| ALYDVVTKL                | GIDPNIRTGV           |
| QPEKGGRKPA               | RDWAHNGL             |
| RLWHYPCTV                | LEDRDRSEL            |
| CINGVCWTV                | MMMNWSPTT            |
| KLVALGINAV               | WSPTAALVVAQLLRI      |
| AVFGPLWIL                |                      |

**Chronically-Infected Subjects**

**Same virus**

| Subject 17               |                      |
|--------------------------|----------------------|
| Initial T cell responses | New T cell responses |
| EPEPDVAVL                | LNVRGGRDAVILLMCV     |
| KLVALGINAV               |                      |
| HPNIEEVAL                |                      |
| HPTLVFDIT                |                      |
| GEIPFYGKAI               |                      |
| CSIYPGHITGHRMAW          |                      |
| EECSQHLPYIEQGMMML        |                      |

**Viral Switch**

| Subject 50               |                      |
|--------------------------|----------------------|
| Initial T cell responses | New T cell responses |
| RLWHYPCTV                | LTPAETTVRLRAYM       |
| ALYDVVTKL                | LVAYQATVCARAQA       |
| CINGVCWTV                |                      |
| KLVALGINAV               |                      |
| QGMMLAEQFKQKALGL         |                      |

  

| Subject 51               |                      |
|--------------------------|----------------------|
| Initial T cell responses | New T cell responses |
| MMMNWSPTT                | GLQDCTMLV            |
| YPPKPCGI                 | ALYDVVTKL            |
| RLIVFPDLGV               | CINGVCWTV            |
|                          | CSIYPGHITGHRMAW      |

  

| Subject 30               |                      |
|--------------------------|----------------------|
| Initial T cell responses | New T cell responses |
| CINGVCWTV                | RLIVFDLGV            |
| DYPYRLWHY                |                      |
| SPVVVGTDDRSGAPTY         |                      |
| TTDRSGAPTYSWGA           |                      |

## Supplementary Figure Legends

Supplementary Figure 1. Graphs demonstrating the history of viremia and plasma ALT levels in reinfected subjects. HCV genotype of primary infection and reinfection are indicated and the time over which a unique virus is detected is denoted by a horizontal black line. Black circles represent HCV RNA concentrations (IU/ml) detected in serum or plasma samples obtained at given time points from date of first detection of viremia. Dotted-line denotes the HCV RNA limit of detection. Samples below the HCV RNA limit of detection were assigned a value of 25 IU/ml. Black triangles denote ALT activity (IU/ml) detected in plasma samples obtained at given time points from date of first detection of viremia.

Supplementary Figure 2. Graphs demonstrating nAb titers in reinfected subjects. Solid line represents the reciprocal ID50 nAb titer against a genotype 1a HCVpp (H77). Samples with undetectable nAb titers were assigned a reciprocal titer of 25. Black circles represent HCV RNA concentrations (IU/ml) detected in serum or plasma samples obtained at given time points from date of first detection of viremia. Dotted-line denotes the HCV RNA limit of detection. Samples below the HCV RNA limit of detection were assigned a value of 25 IU/ml.

Supplementary Figure 3. A) Peptides recognized by new T cell responses in reinfected subjects are evenly distributed across the HCV polyprotein. \* - the location of a peptide recognized by a reinfected subject who clears reinfection; X

- the location of a peptide recognized by a persistently reinfected subject. Two asterisks at the same location indicate recognition of the same peptide by two subjects. B) Linear regression for reductions in maximum viremia during reinfection and the number of new T cell responses in reinfected subjects. Values represent the reduction ( $\log_{10}$ , fold-change) in maximum viremia from initial infection to reinfection.  $R^2$ - and  $P$ -values for correlation are denoted. C) Linear regression for increases in ALT upon reinfection and the number of new T cell responses in reinfected subjects upon reinfection. Values represent the increase (fold-change) in ALT from baseline to reinfection.  $R^2$ - and  $P$ -values for correlation are denoted.

Supplementary Figure 1 part 1

Subject 18

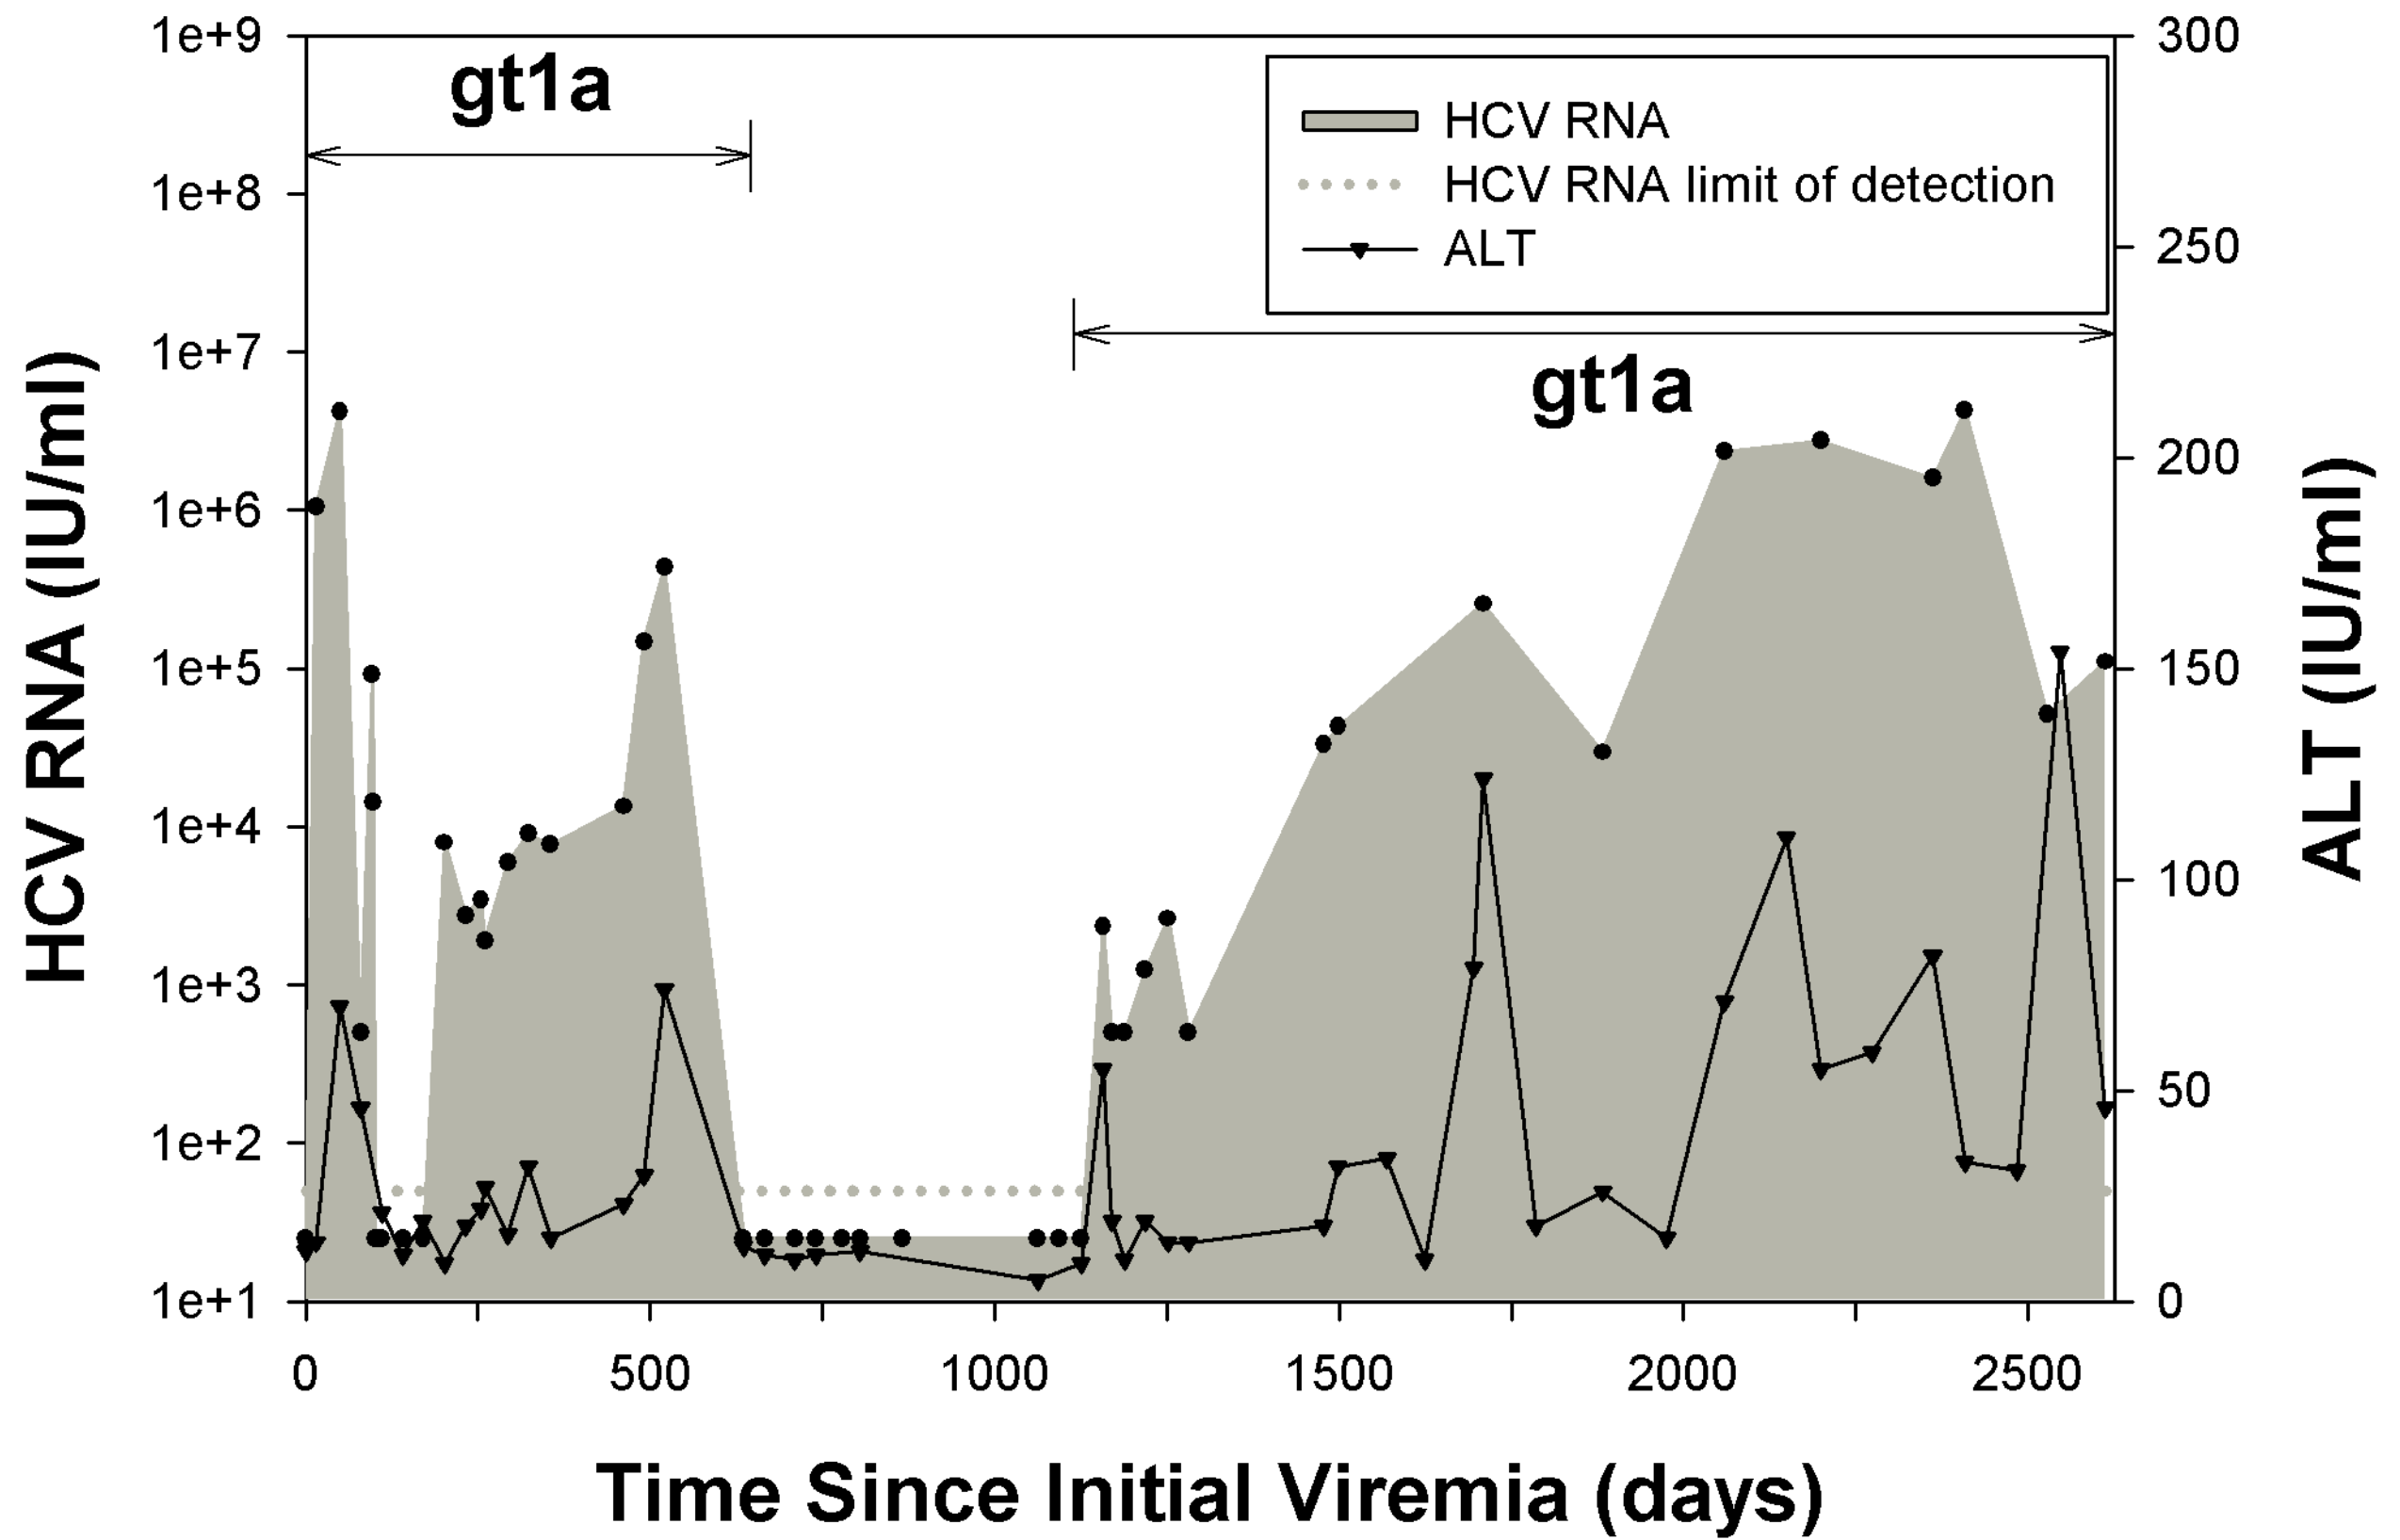

Subject 57

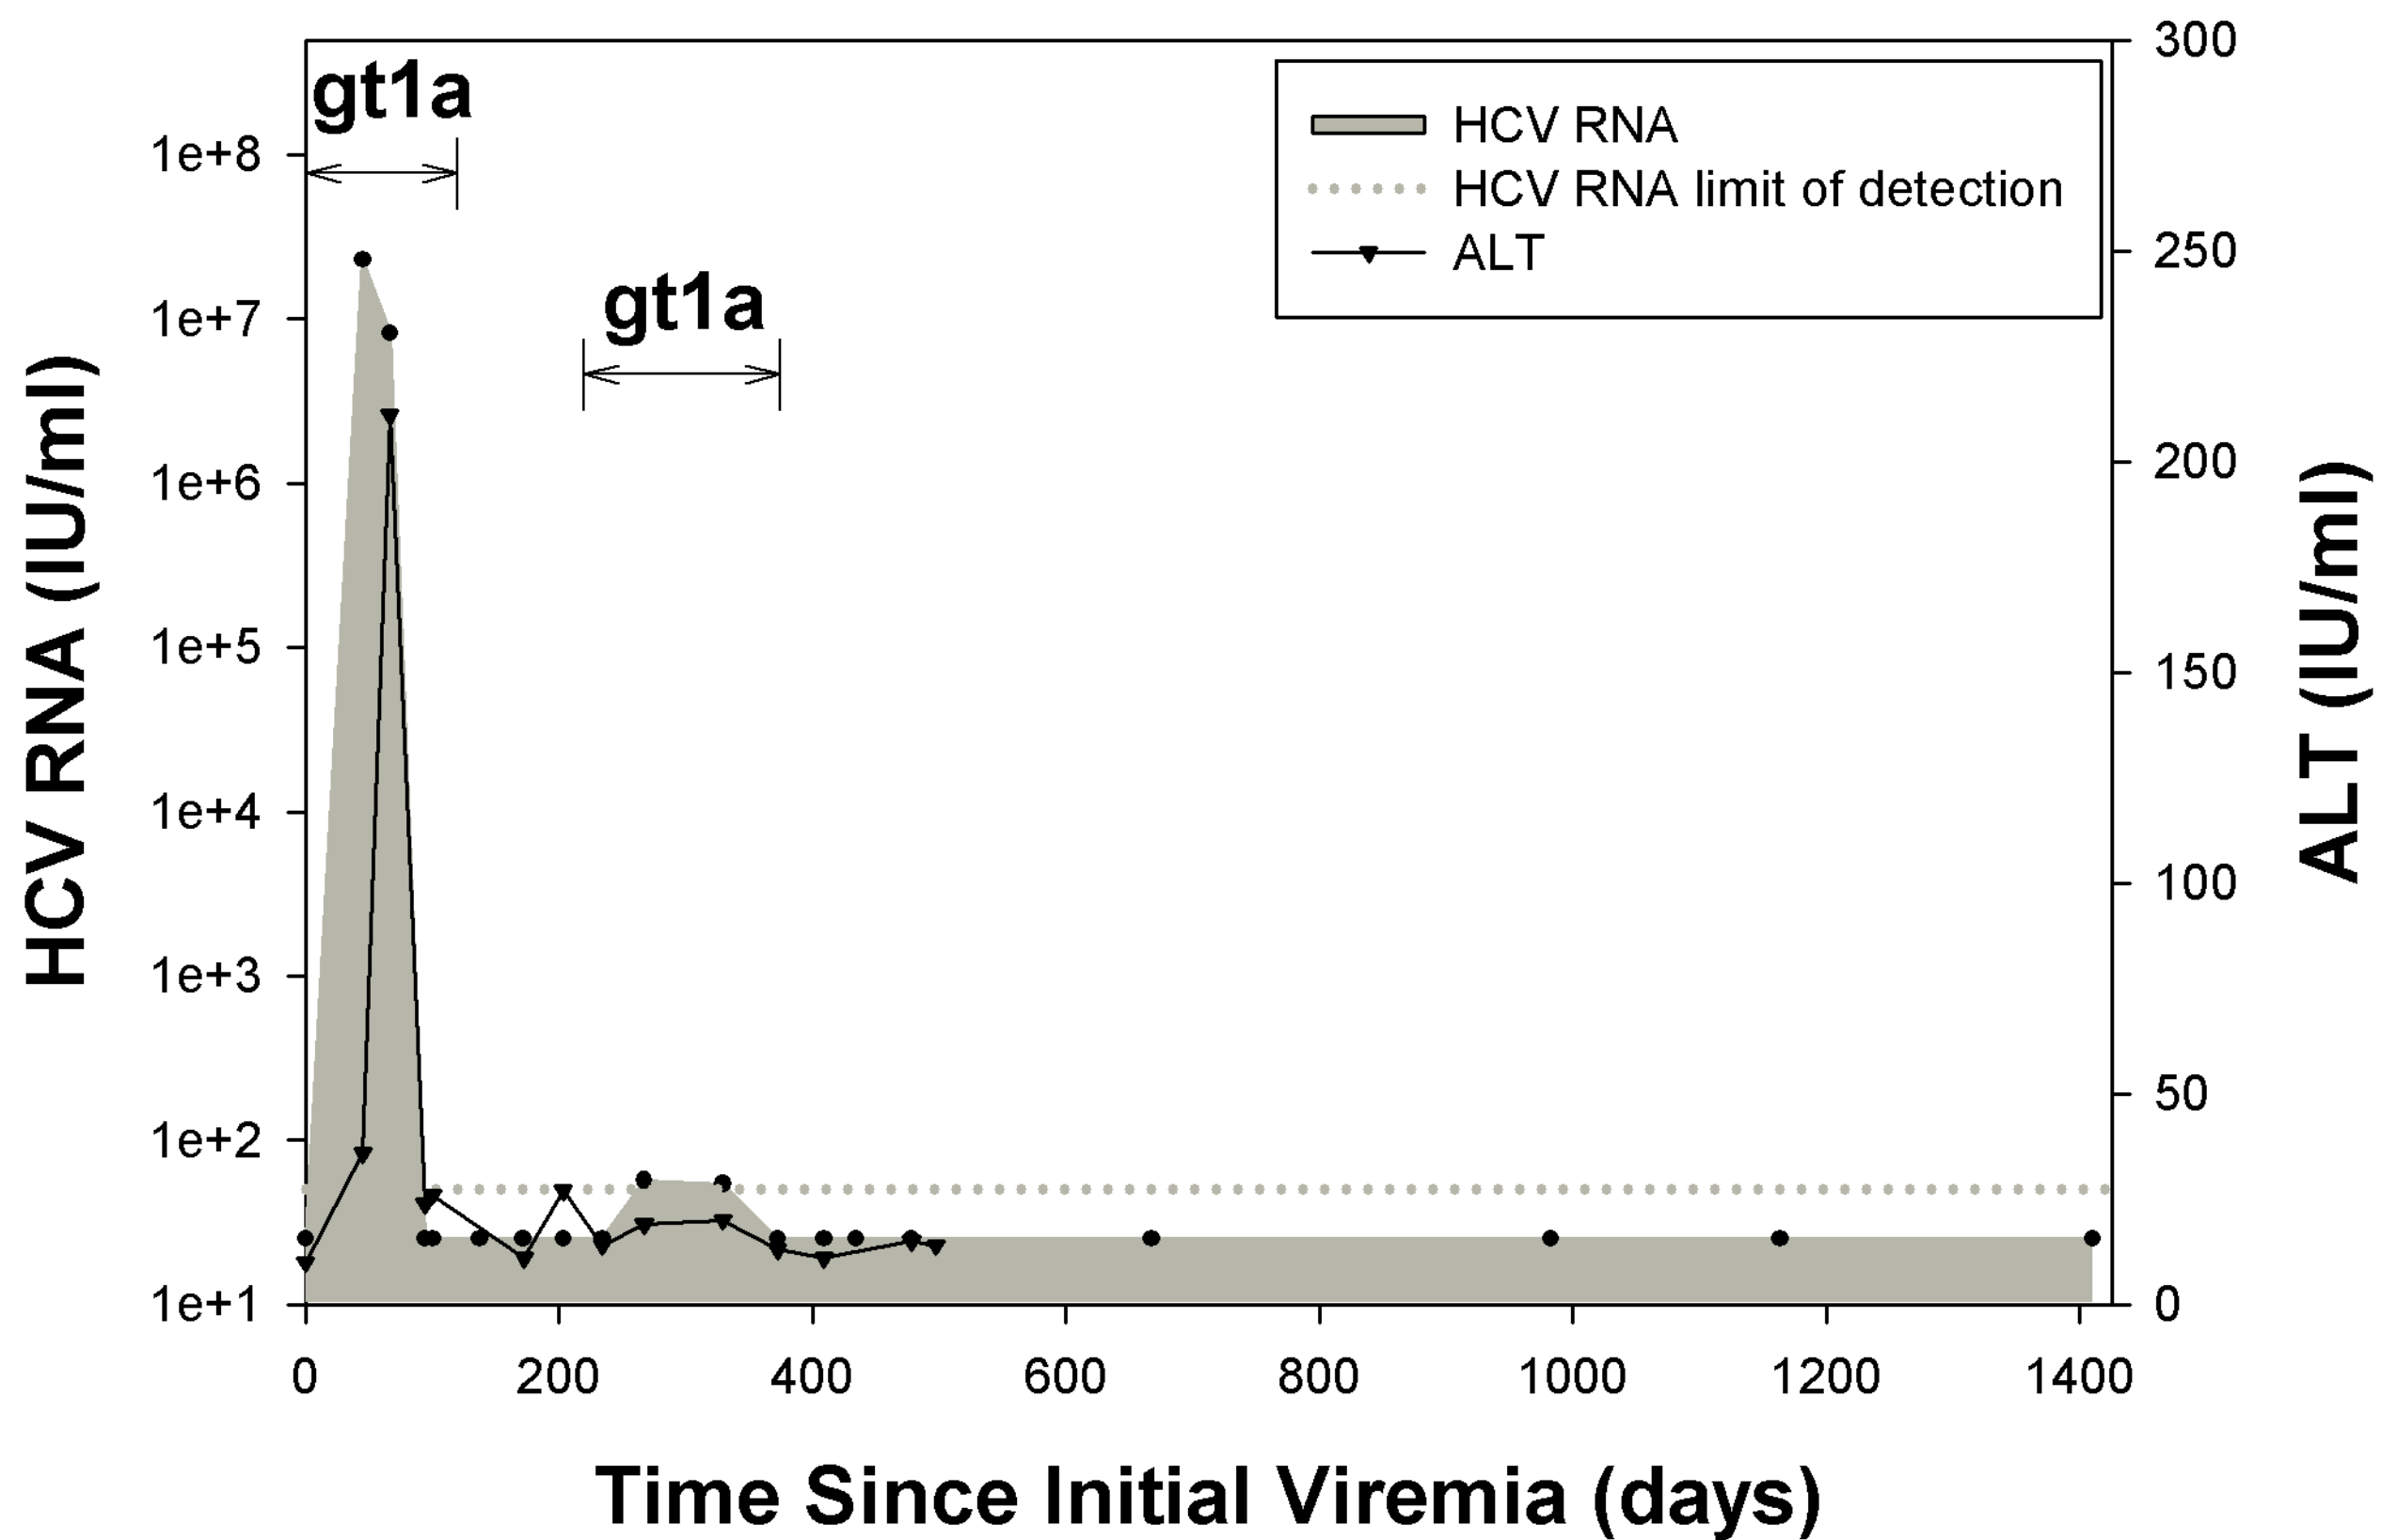

Supplementary Figure 1 part 2

Subject 48

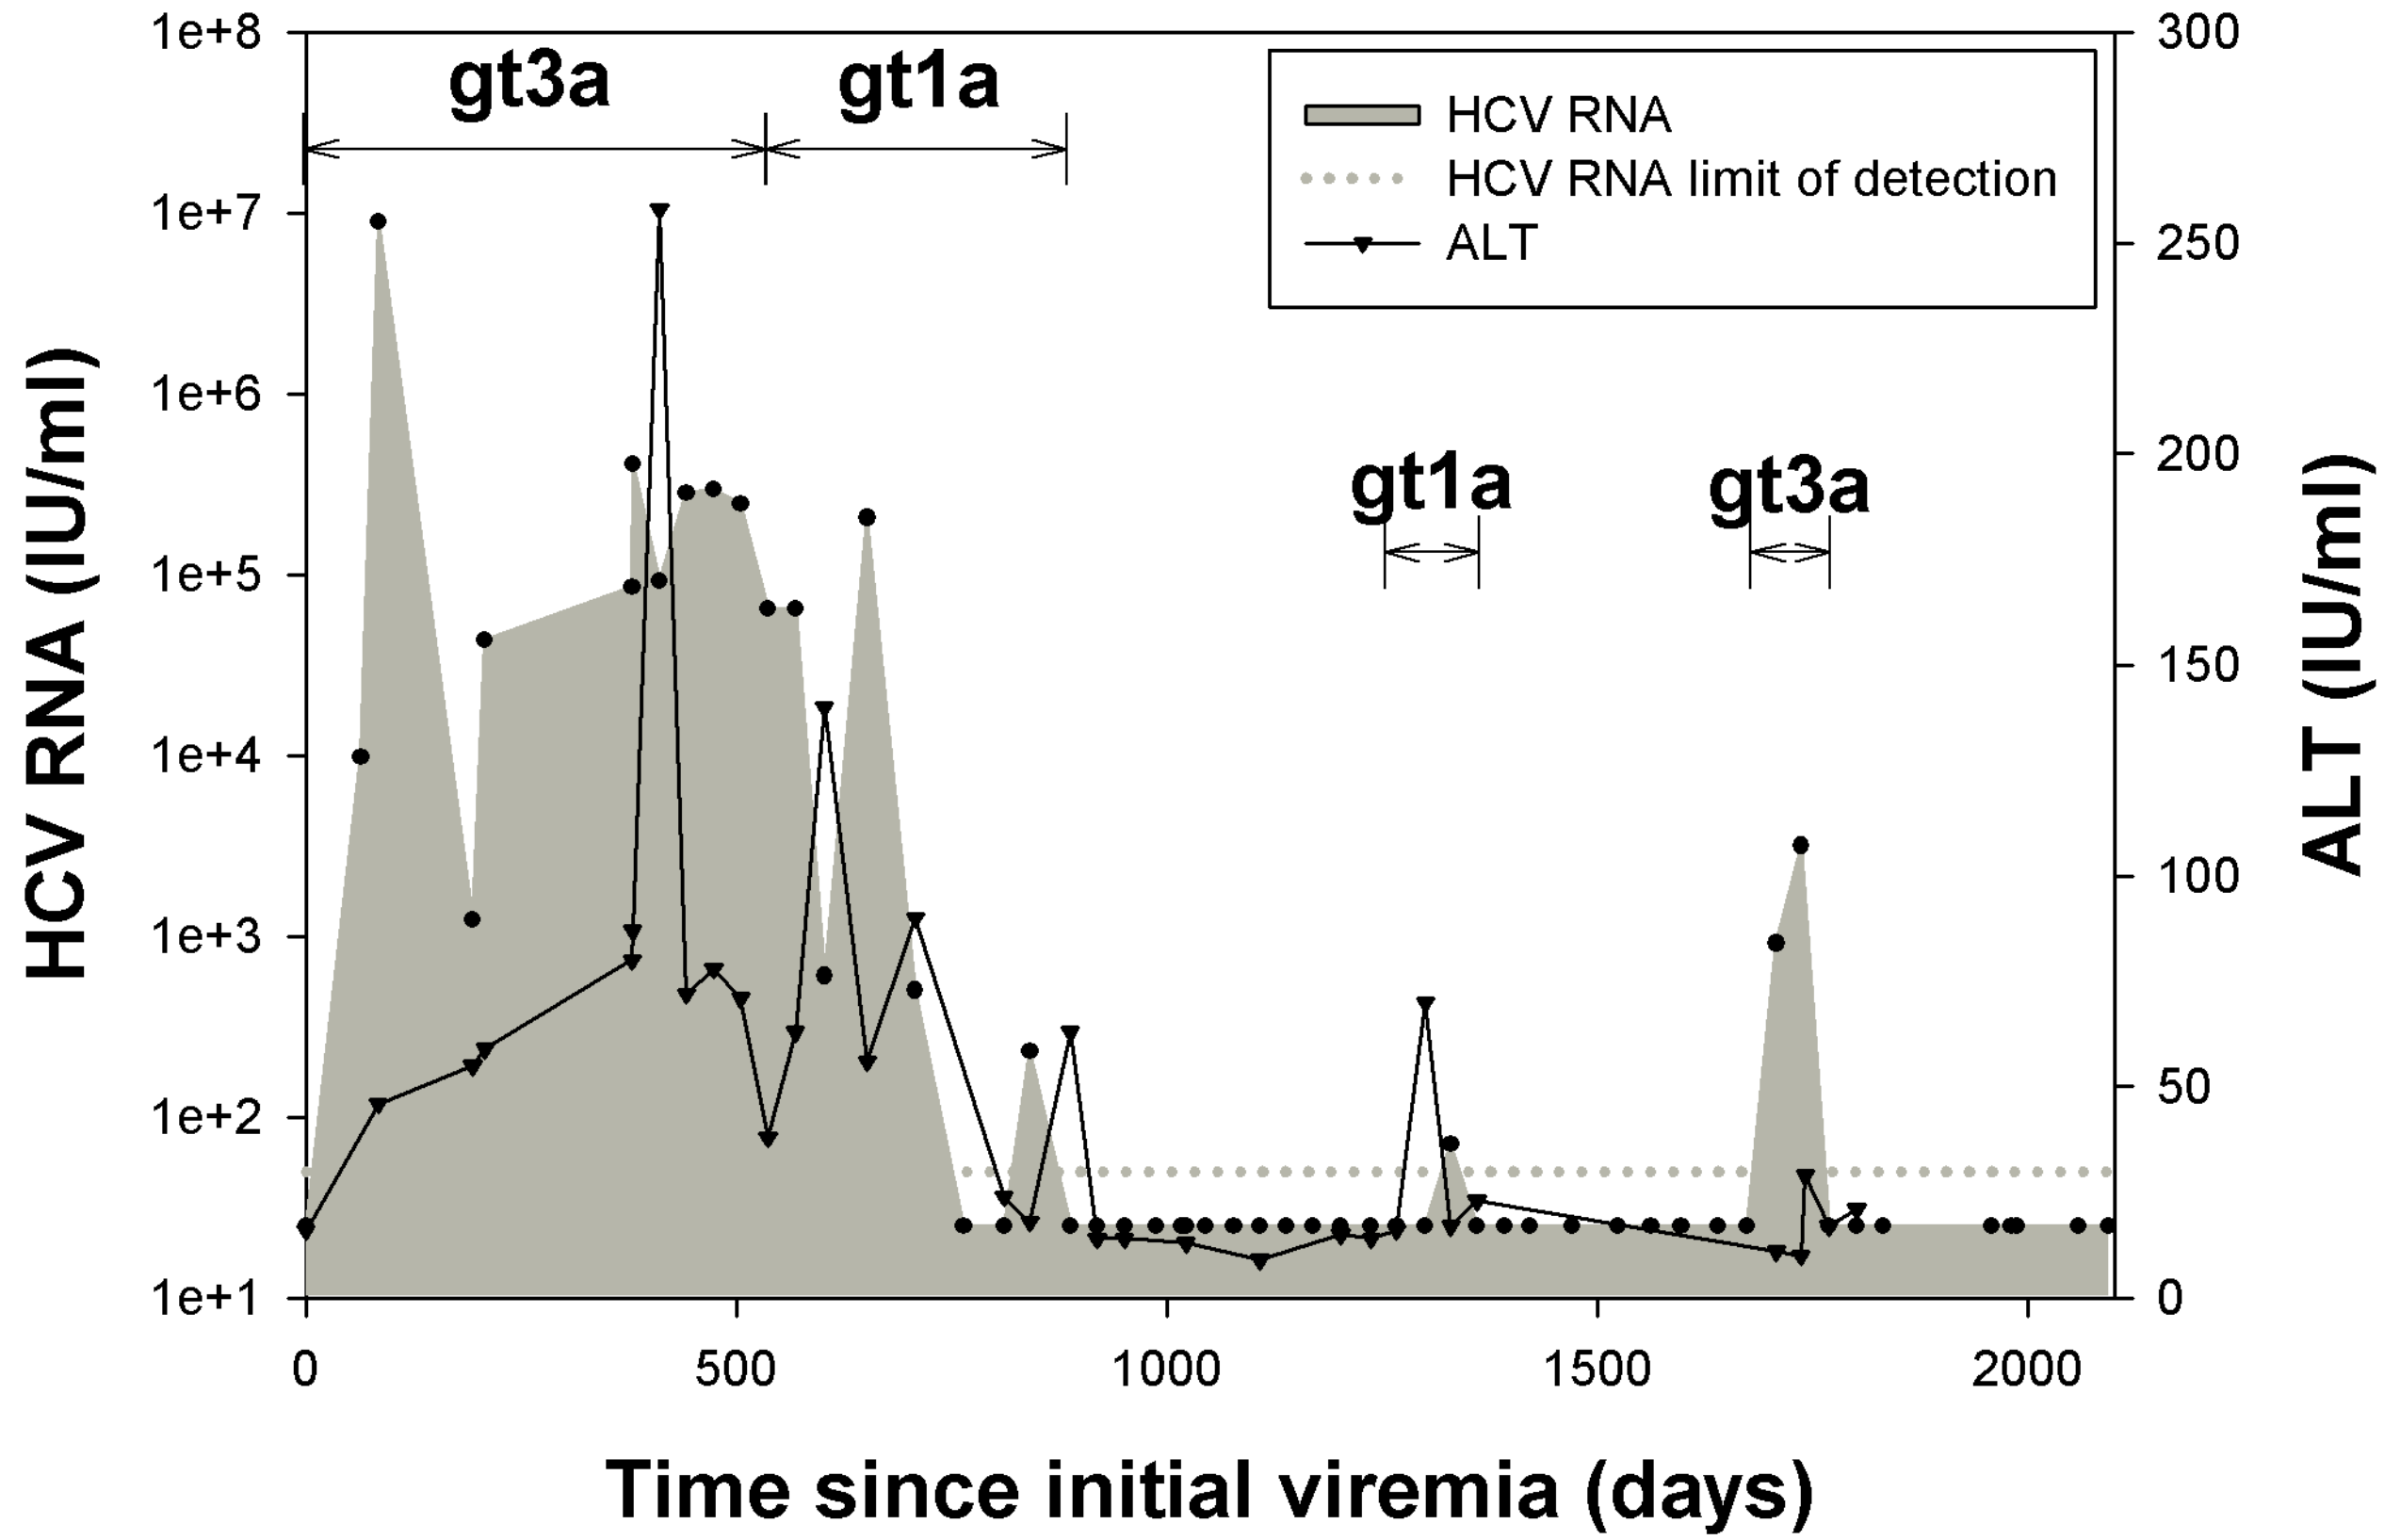

Subject 170

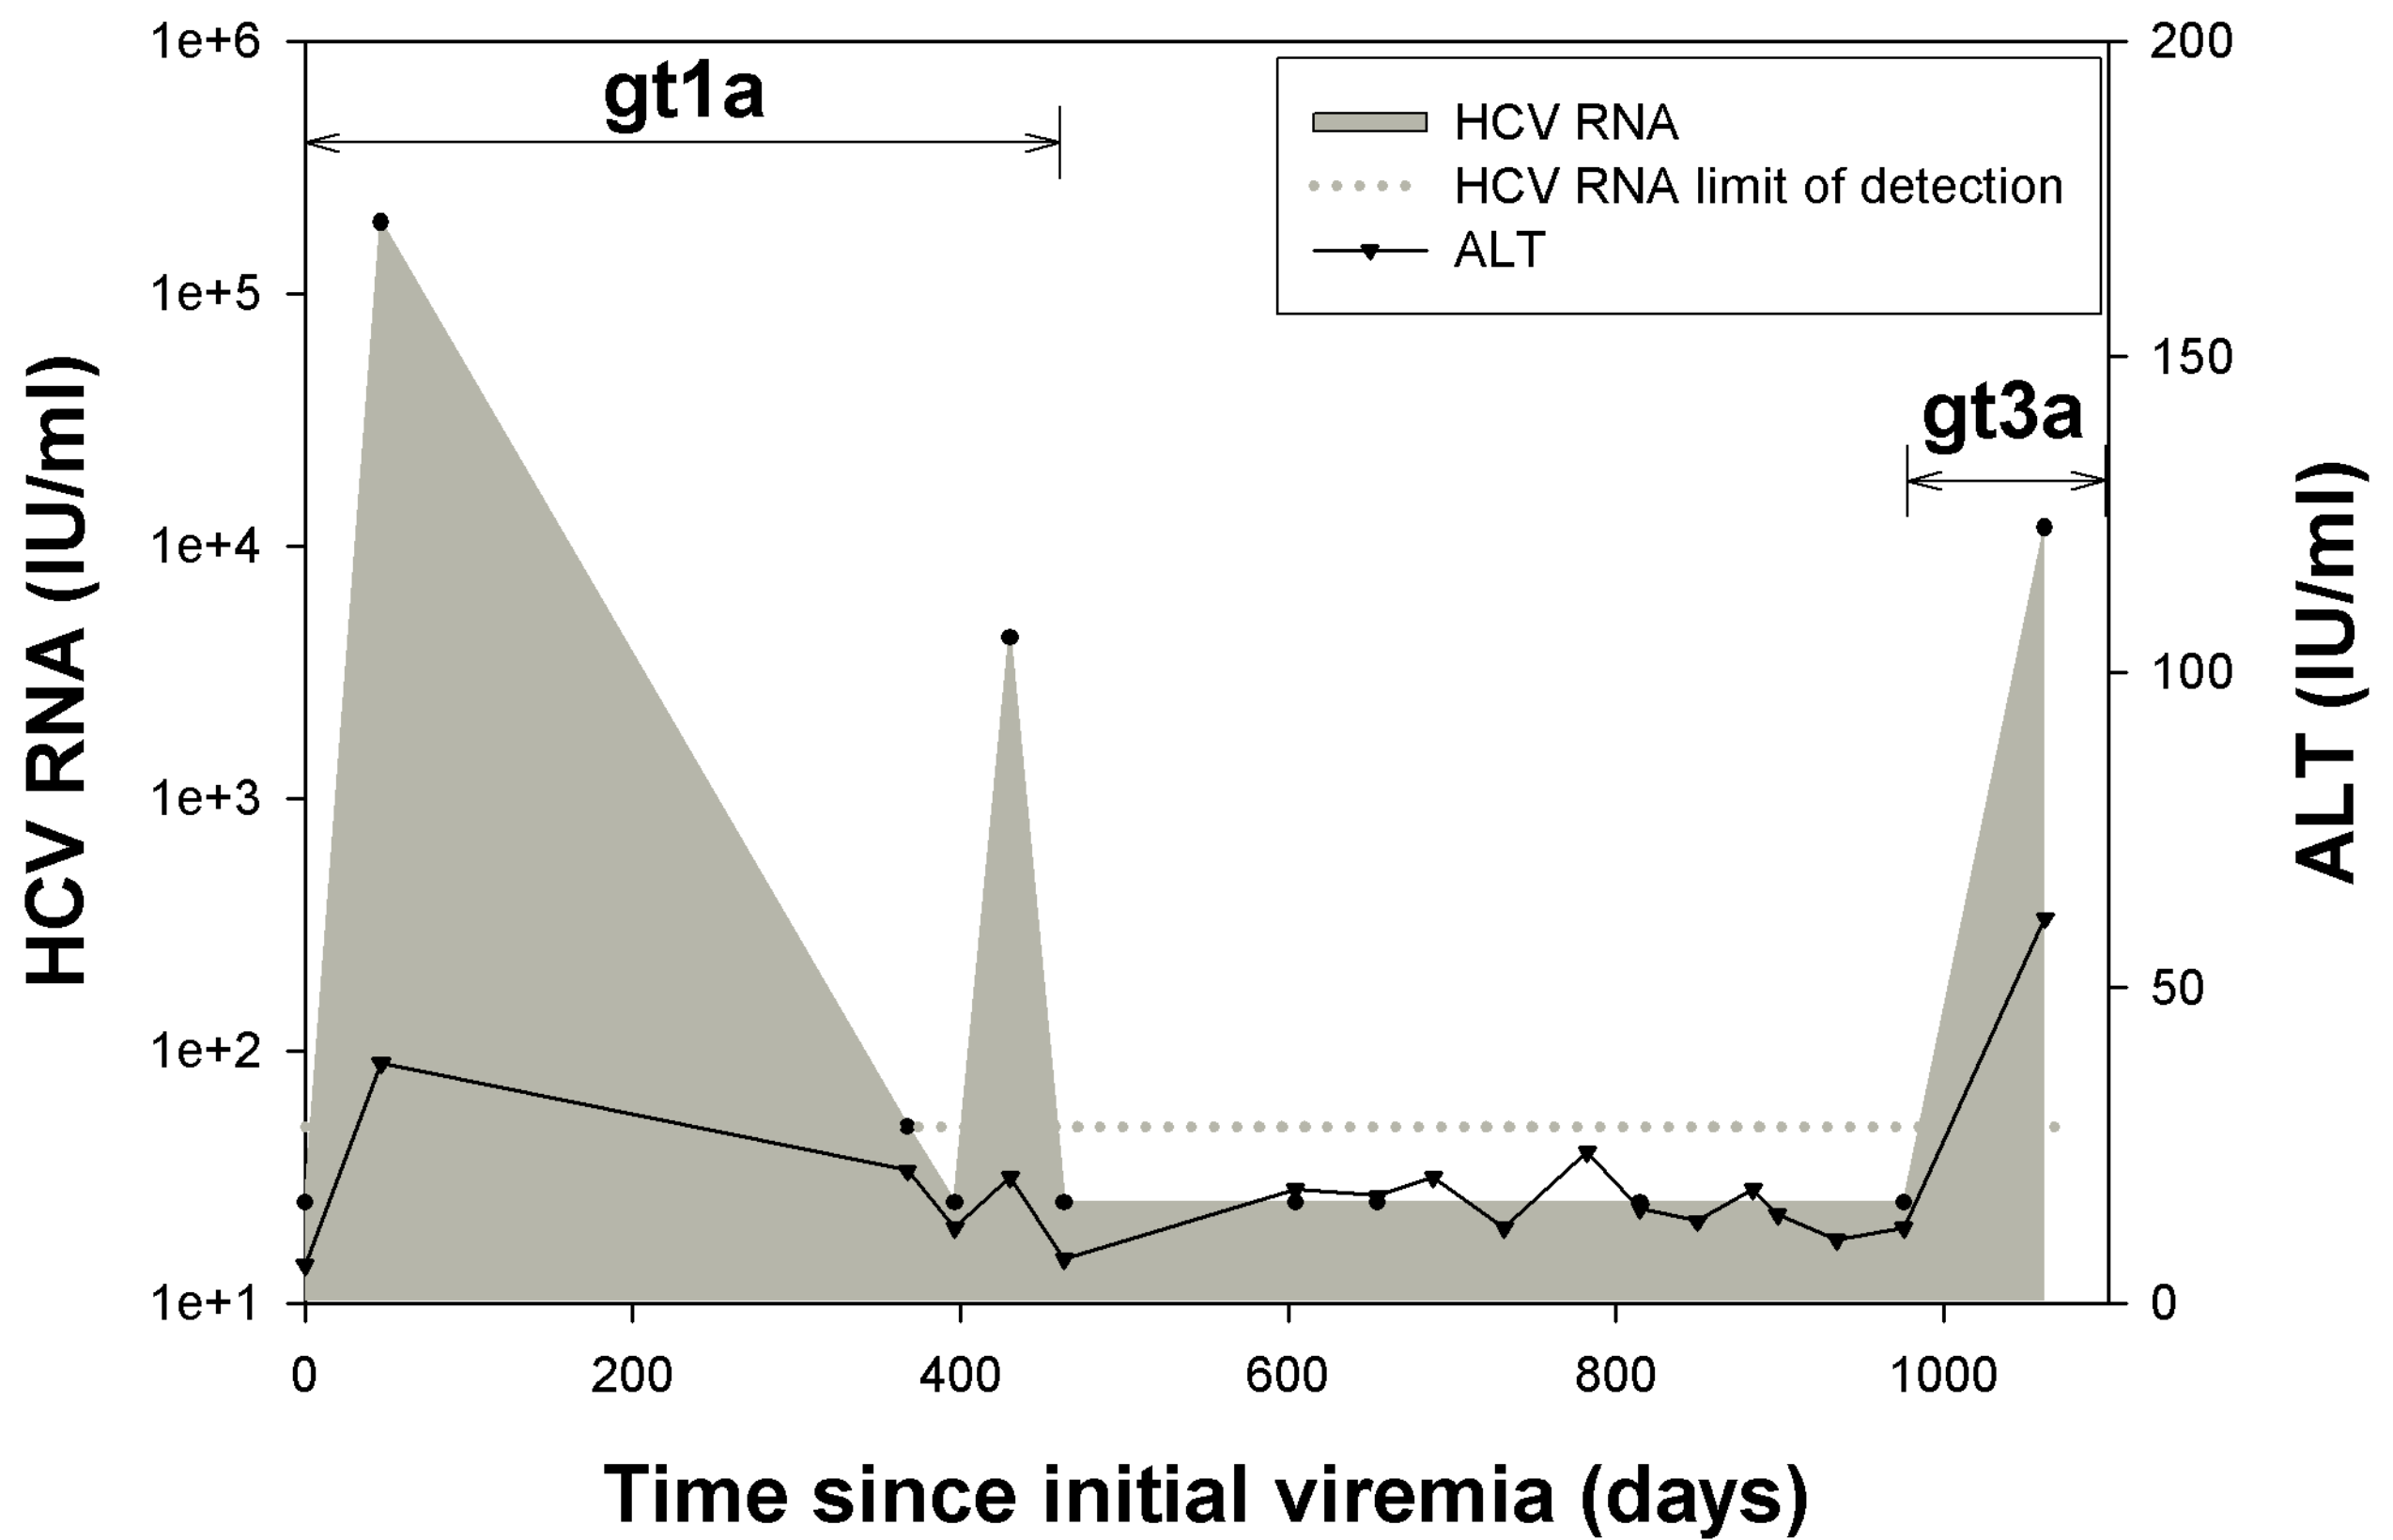

Subject 152

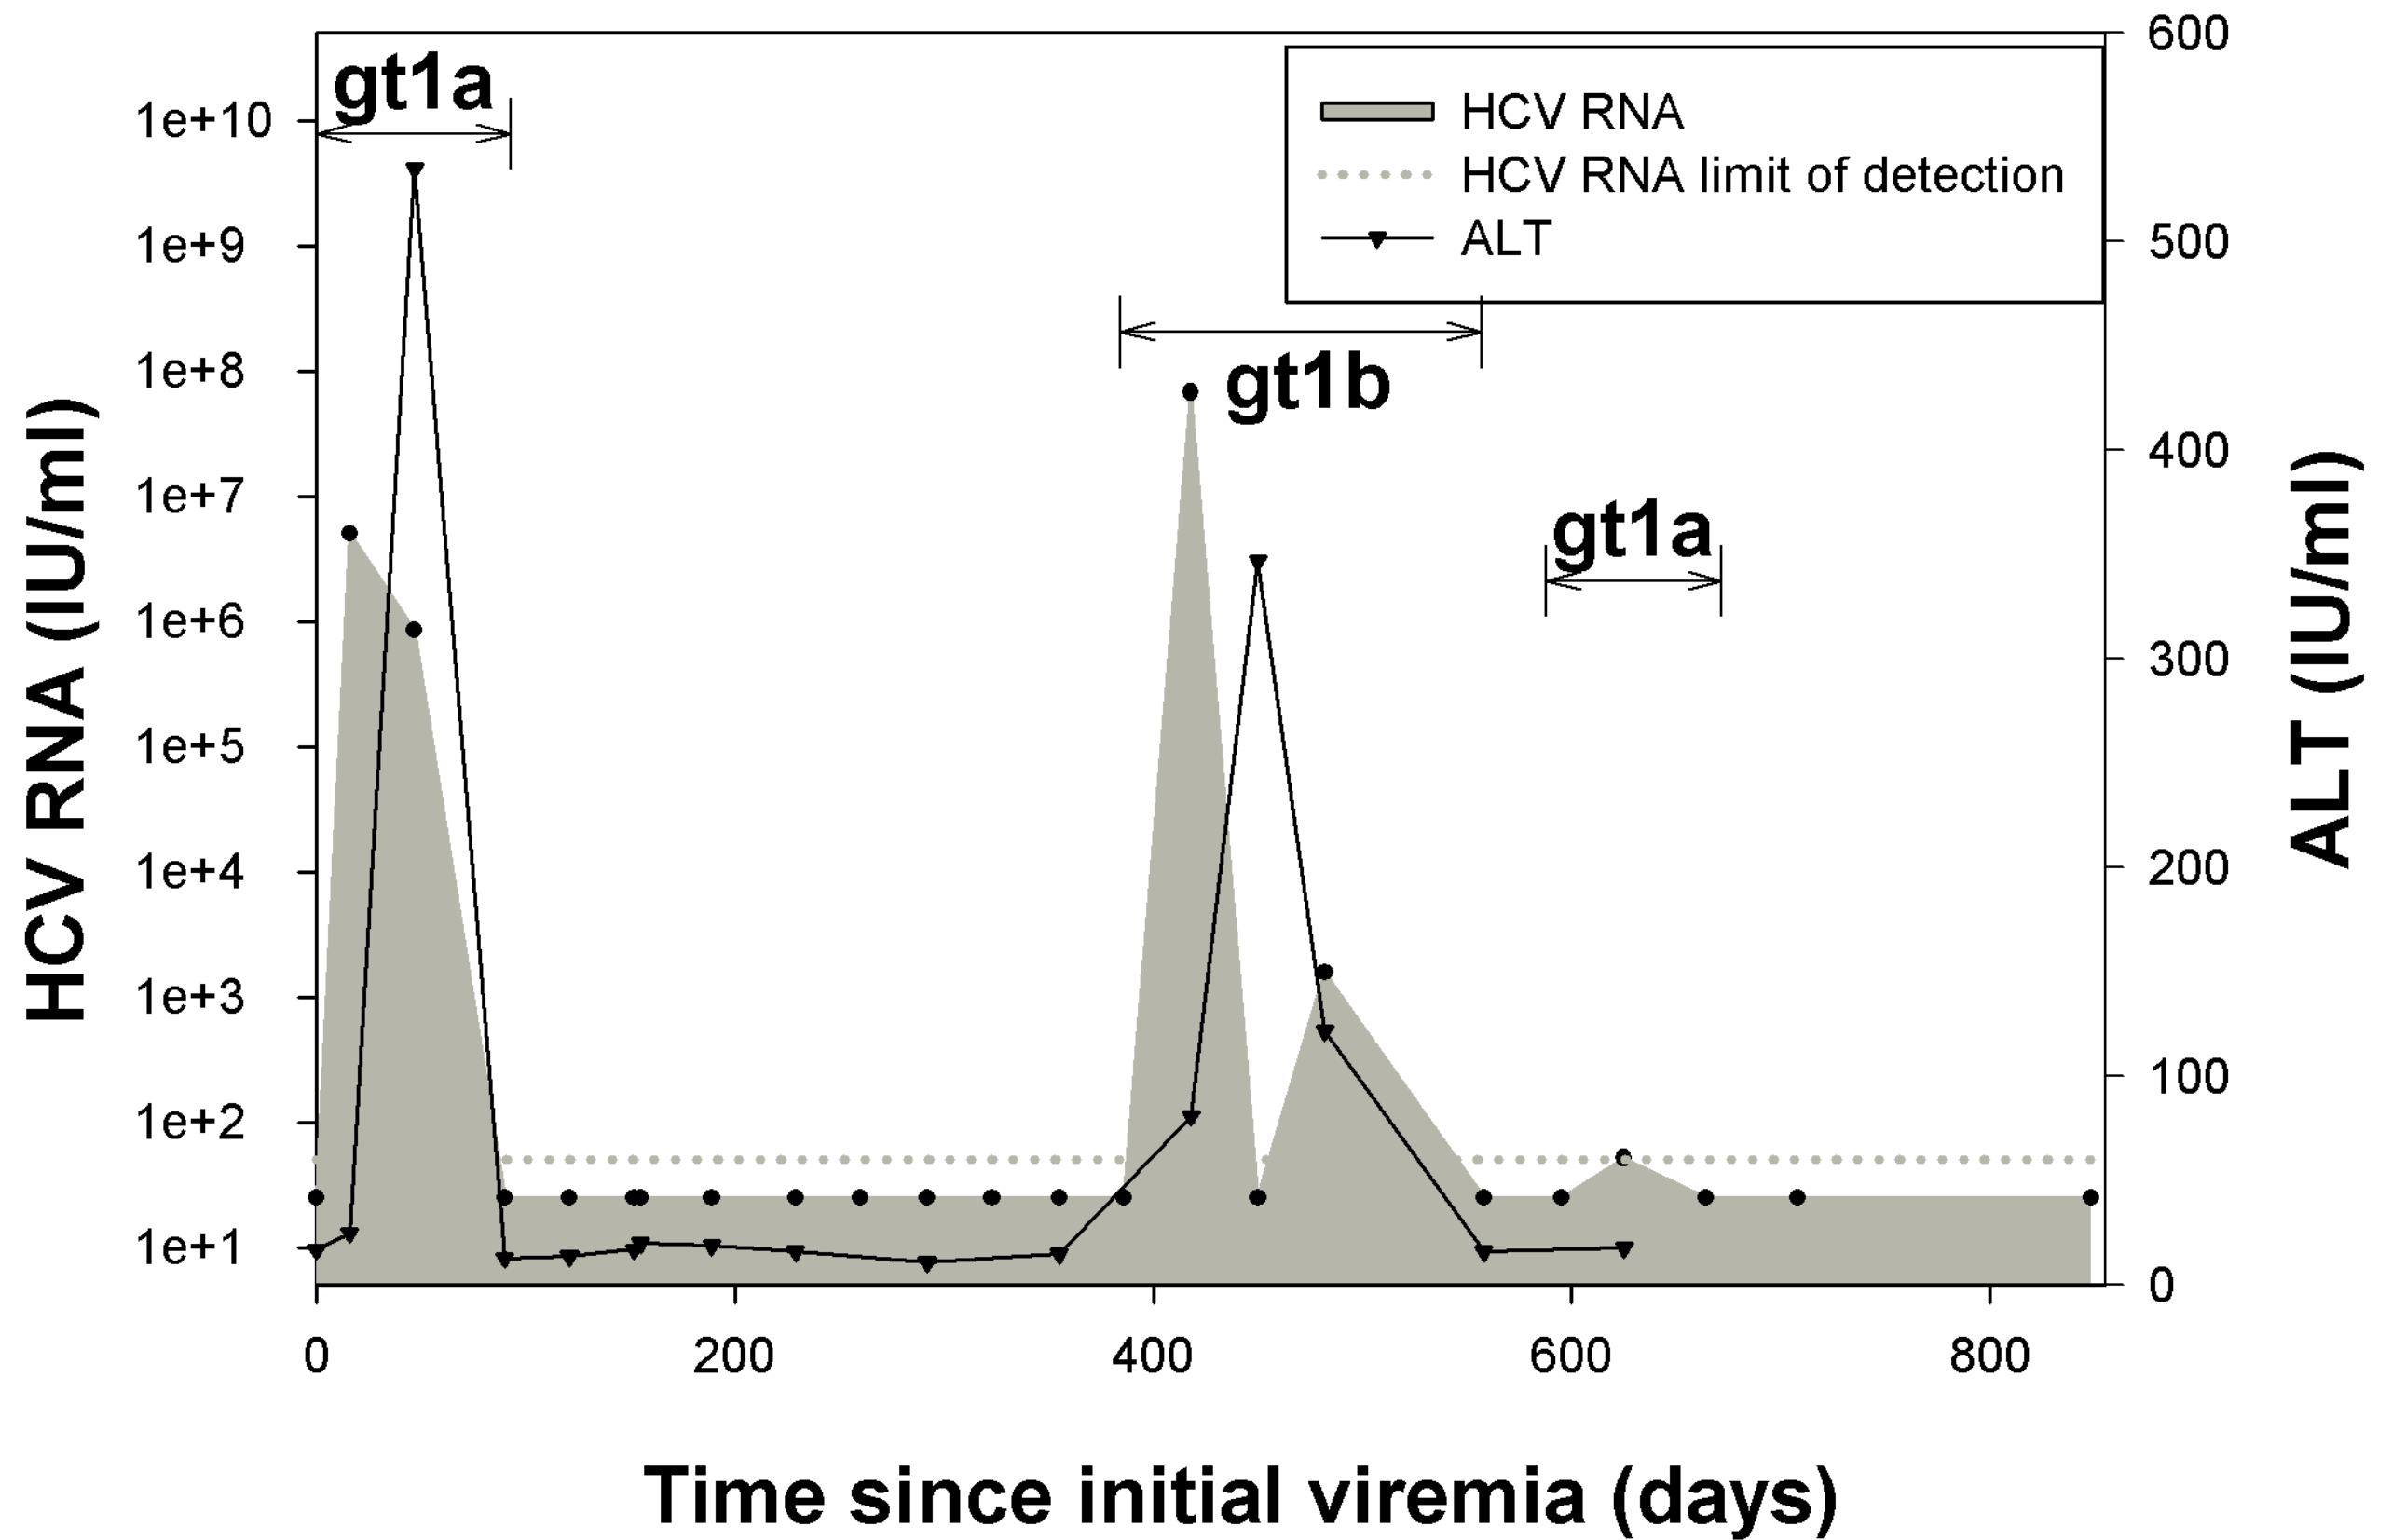

Subject 176

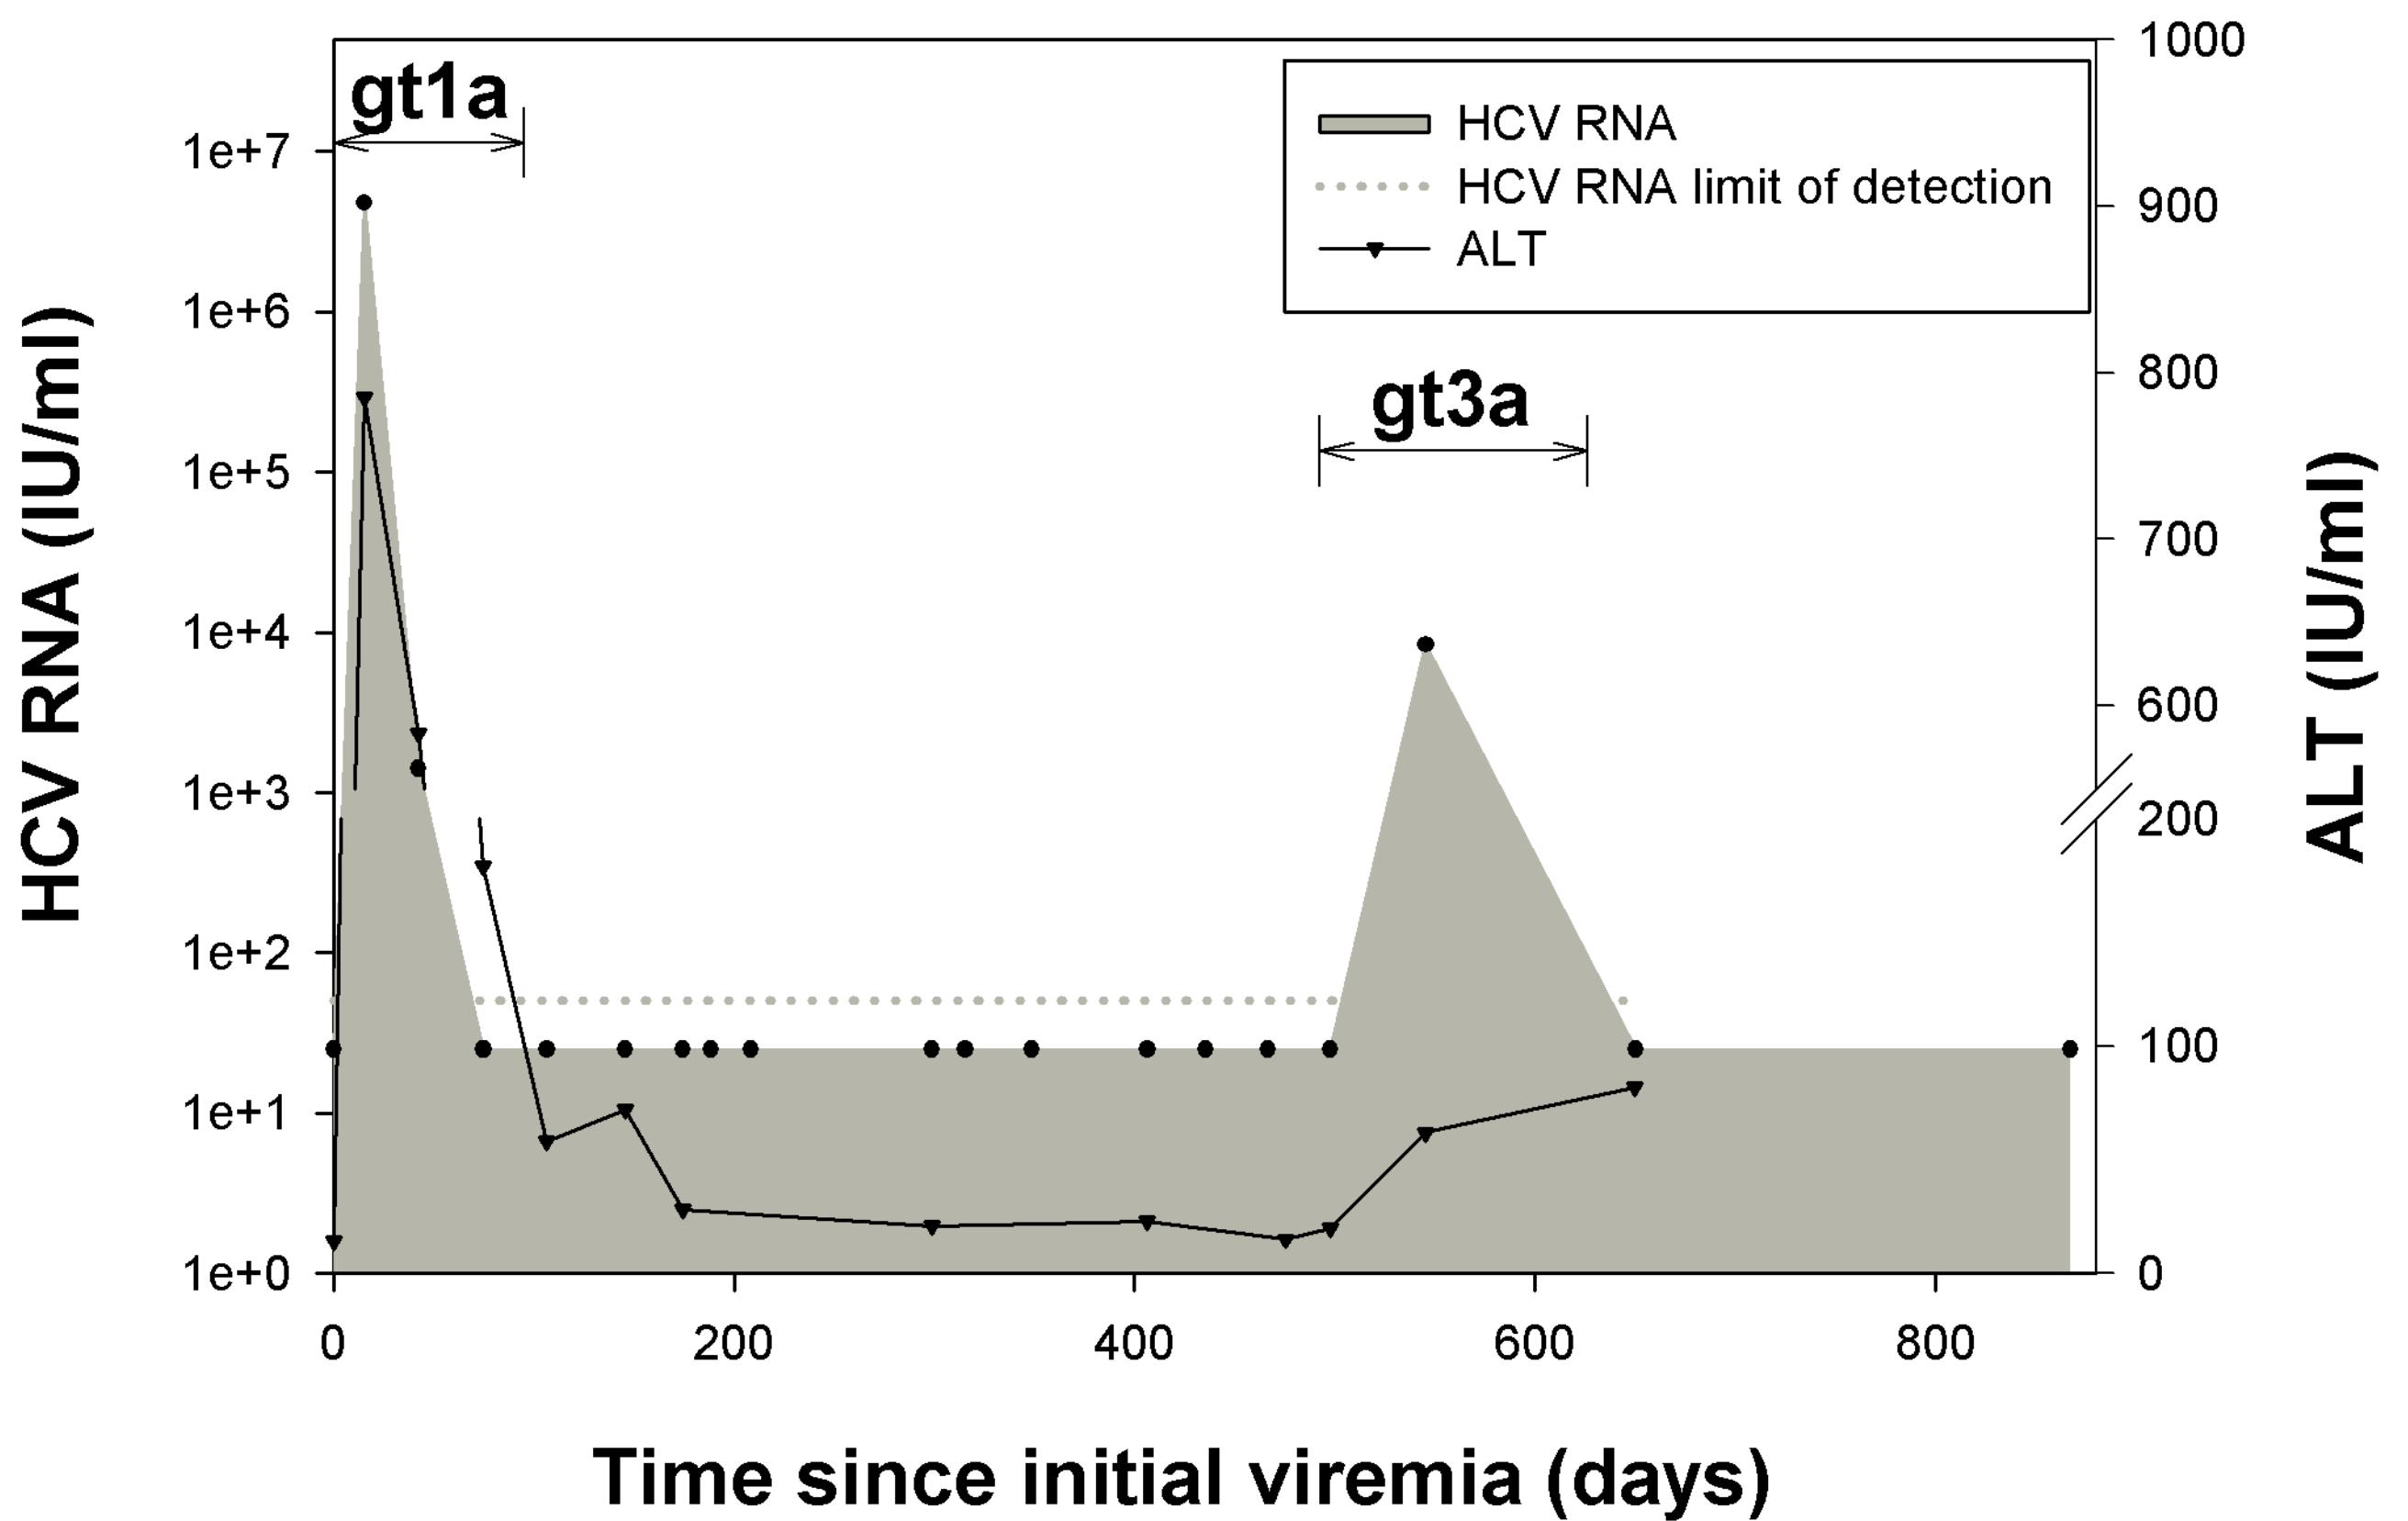

Supplementary Figure 1 part 4

Subject 172

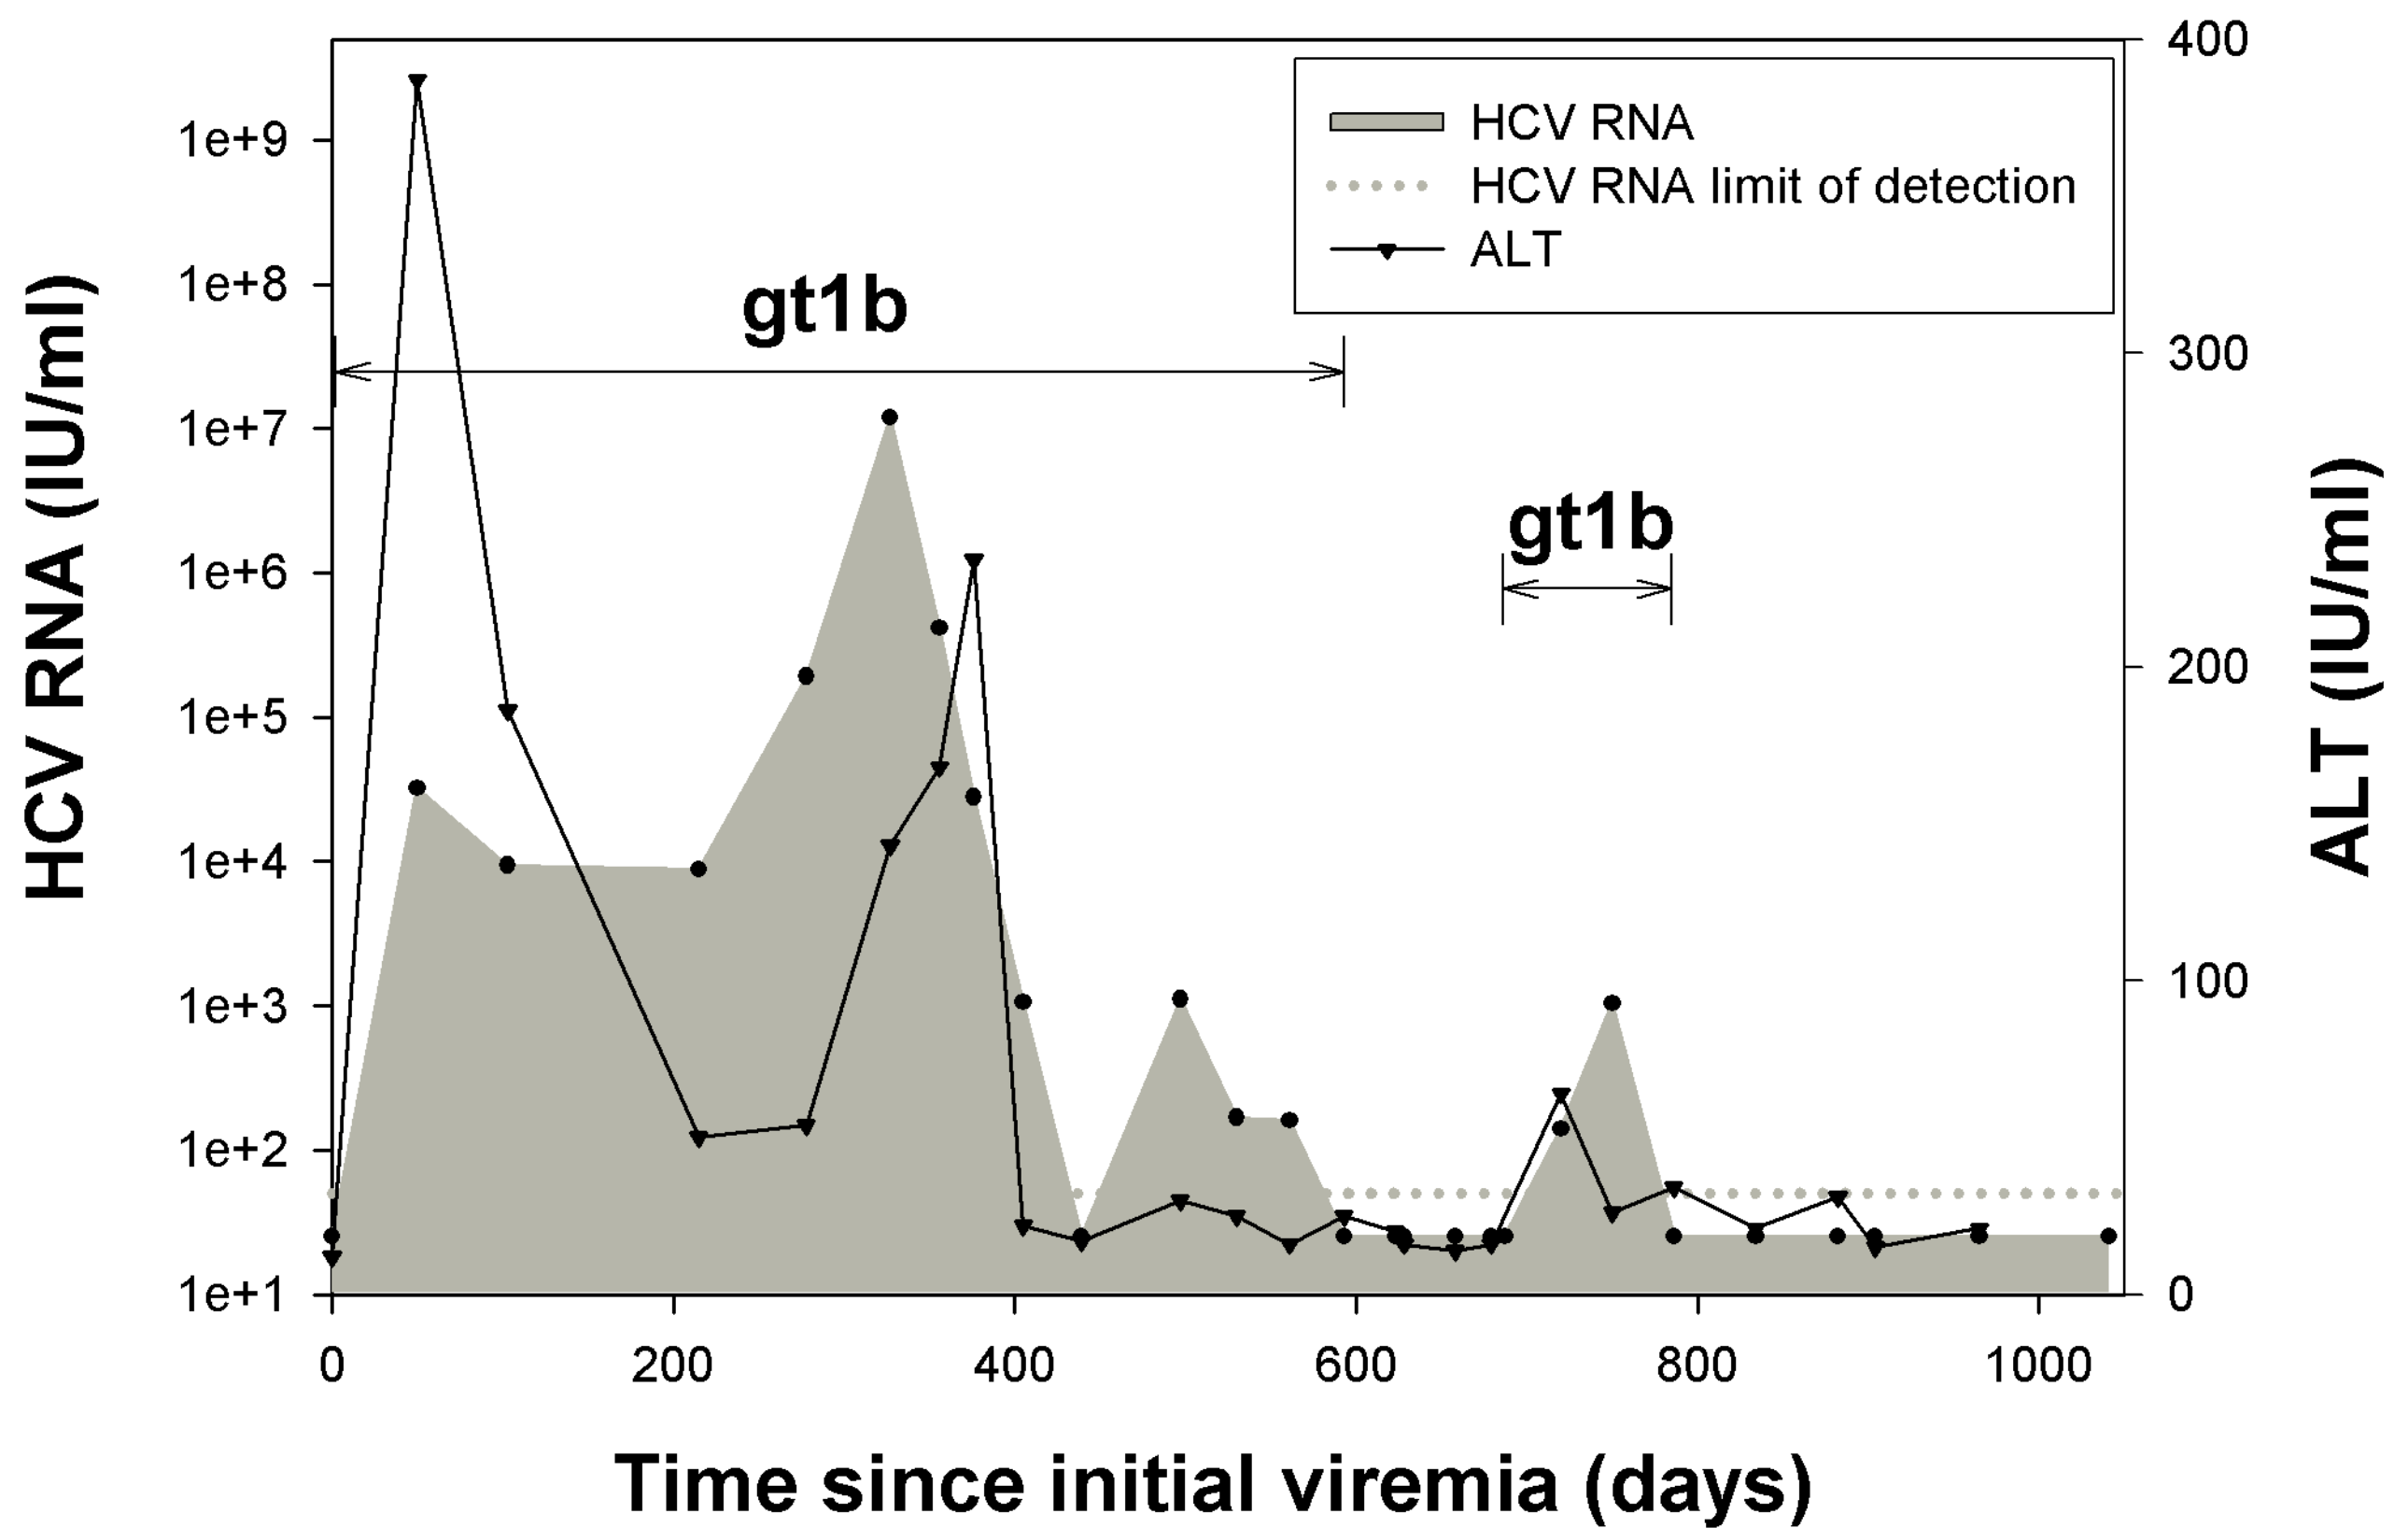

Subject 112

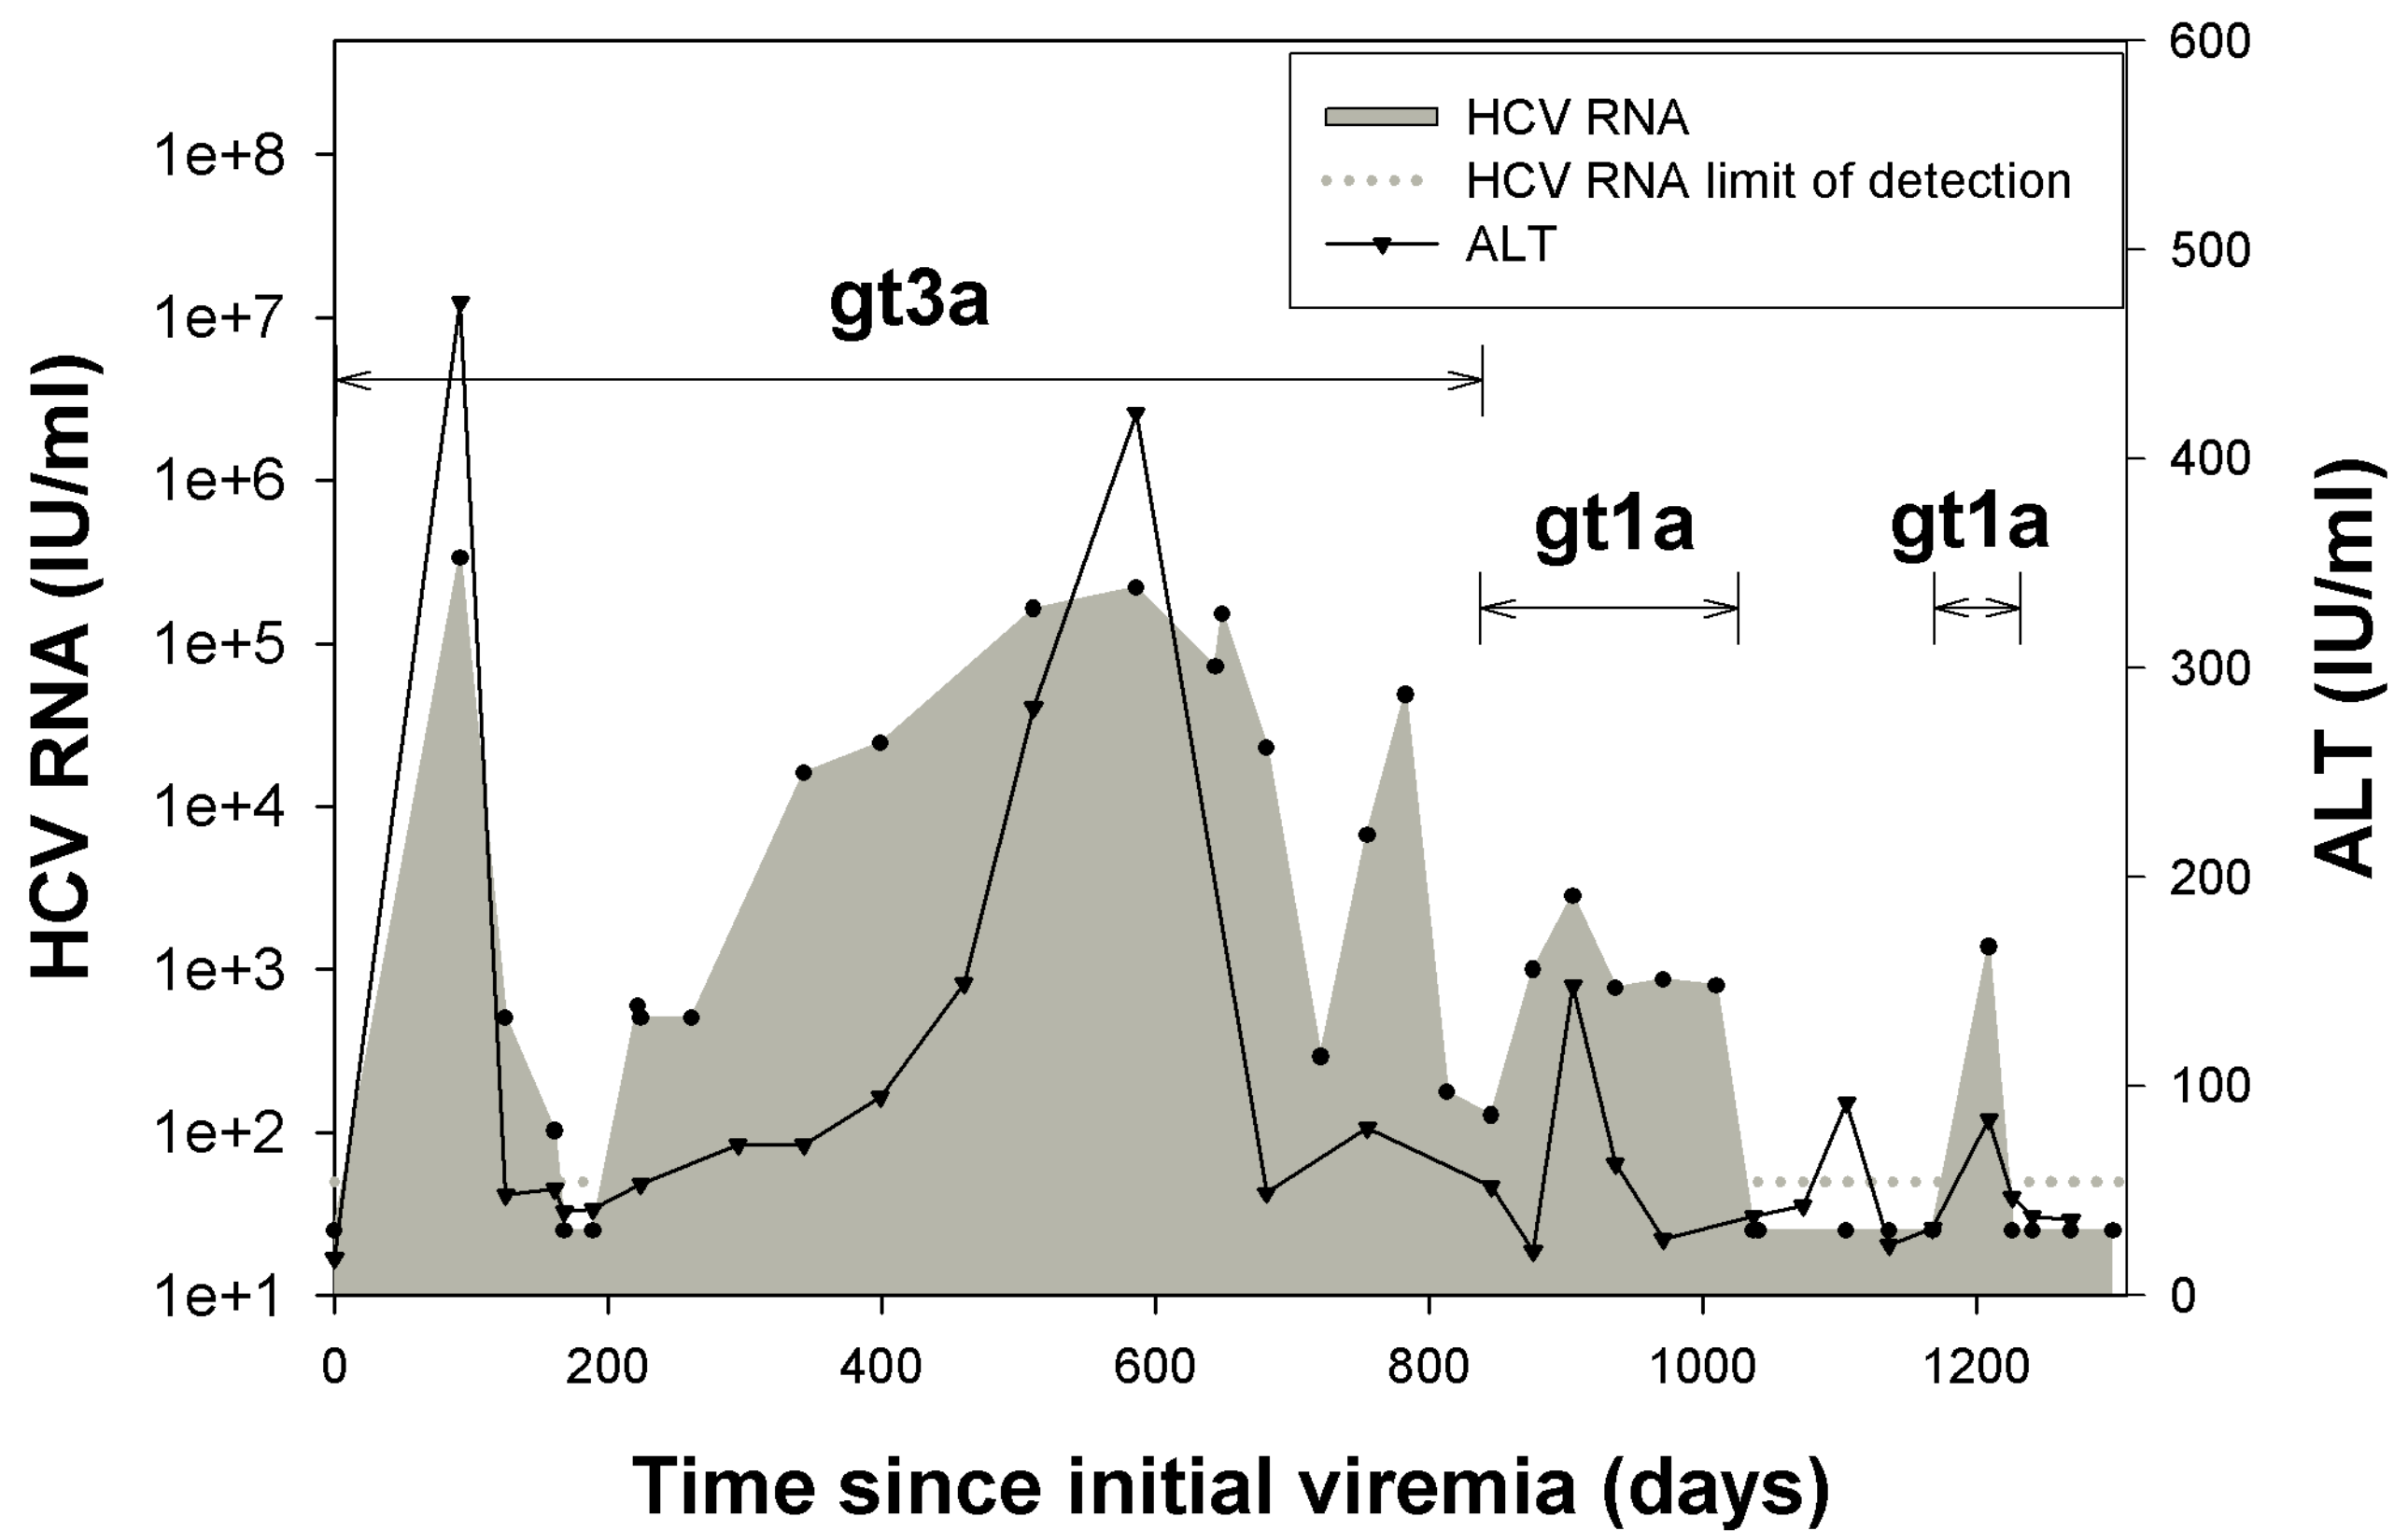



Supplementary Figure 1 part 5

Subject 27

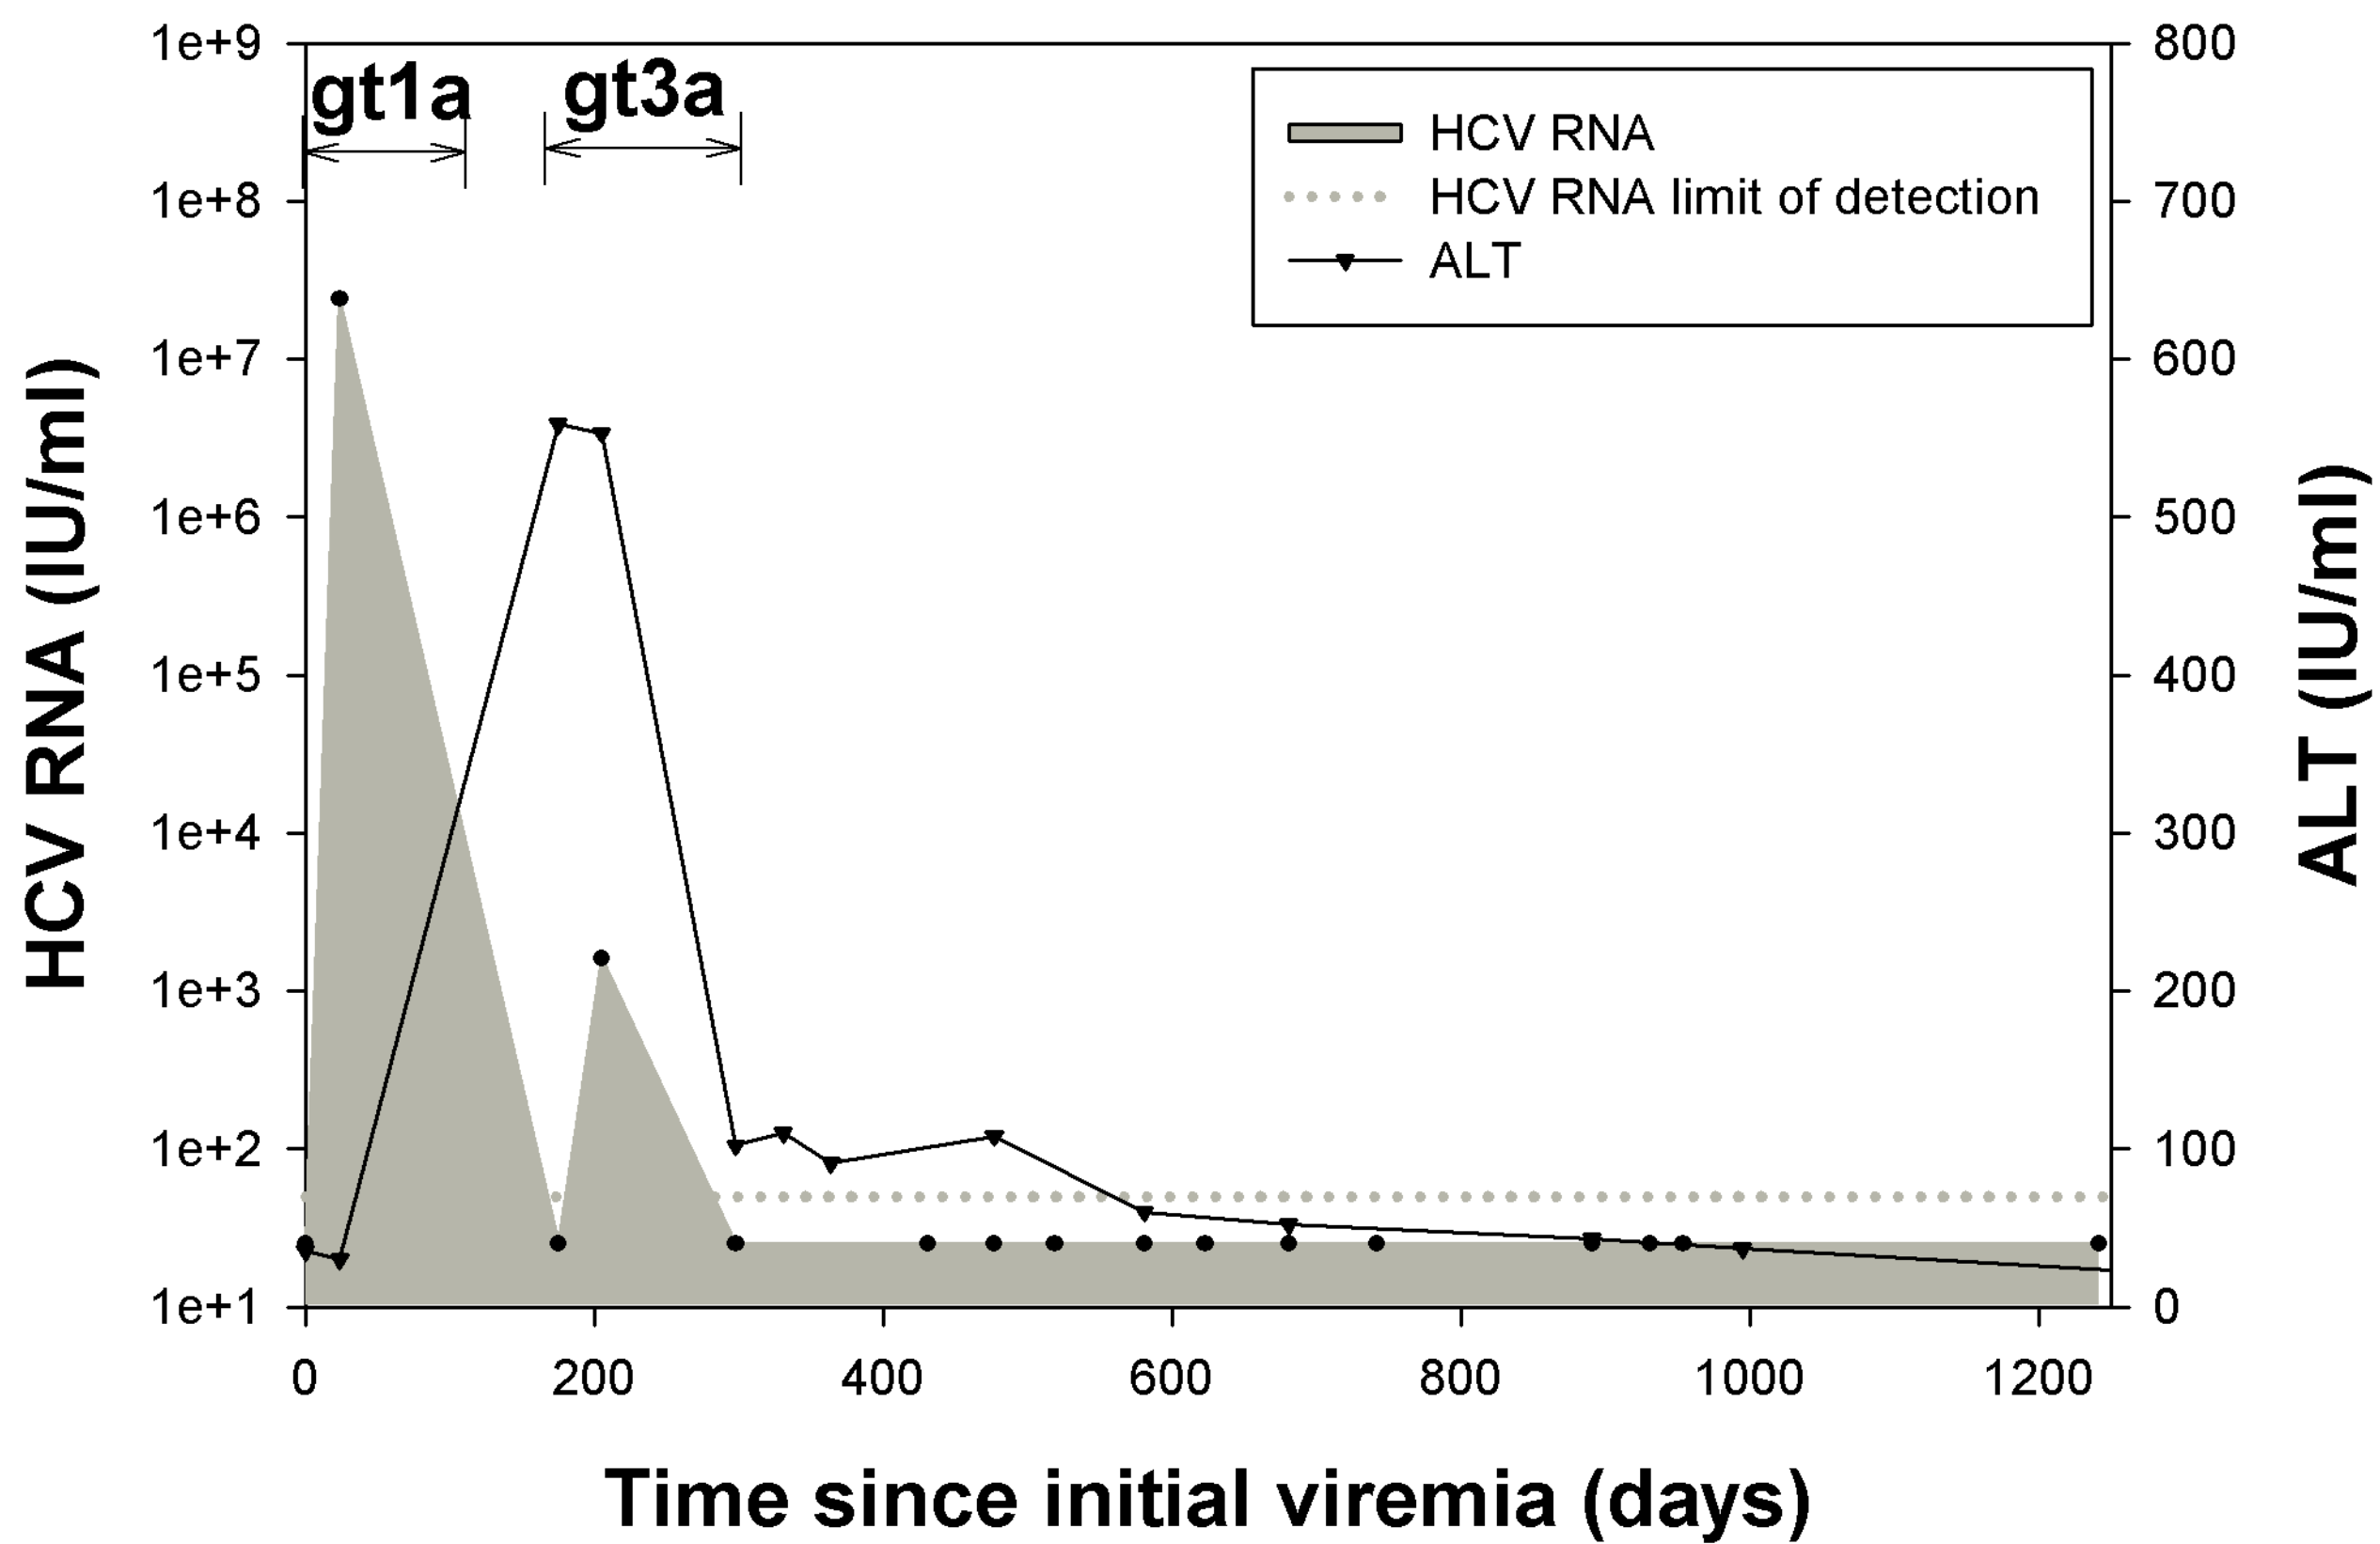

Supplementary Figure 2 part 1

Subject 172

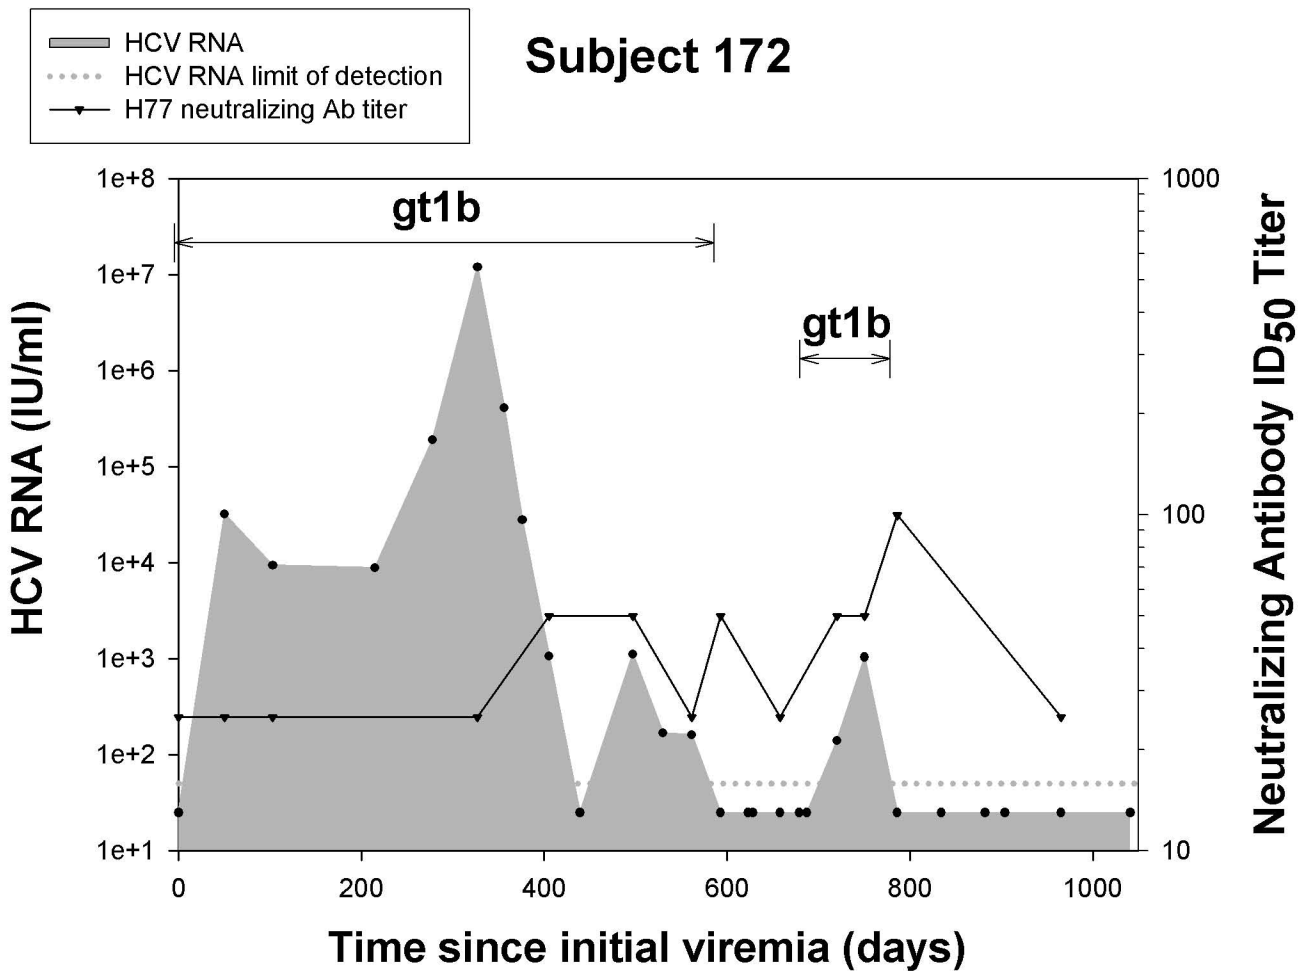

Subject 112

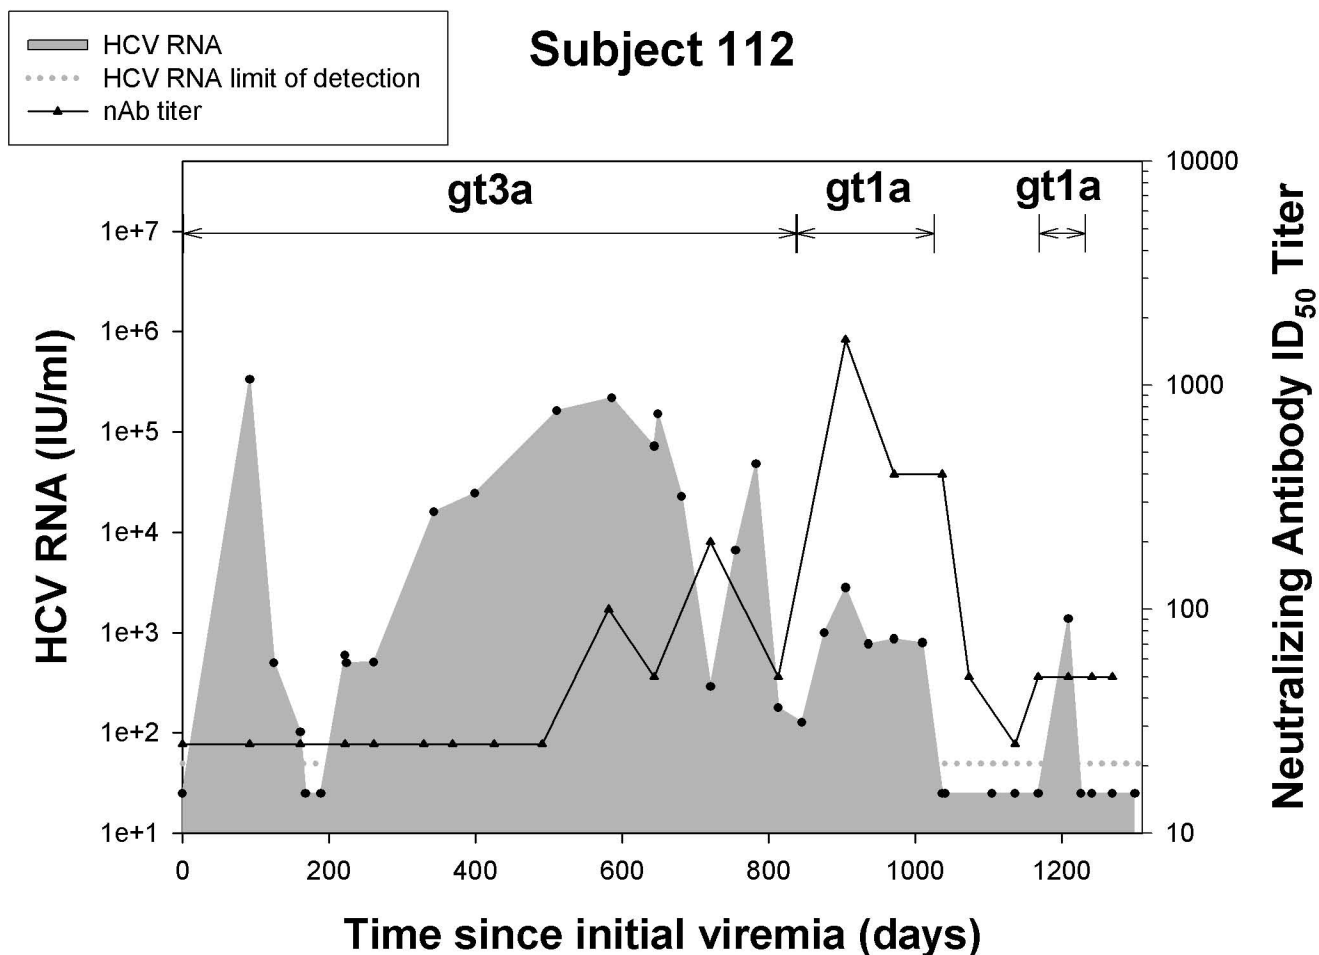

Supplementary Figure 2 part 2

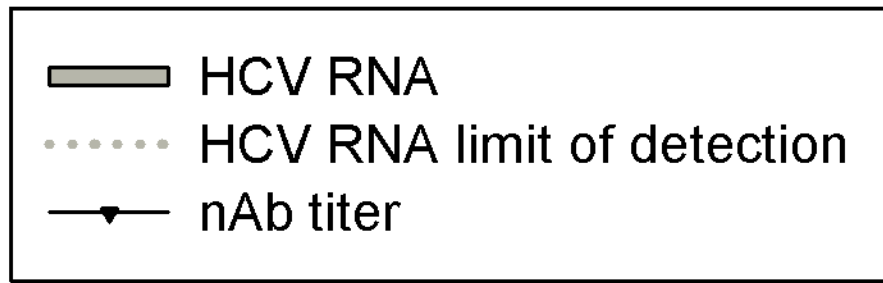

**Subject 152**

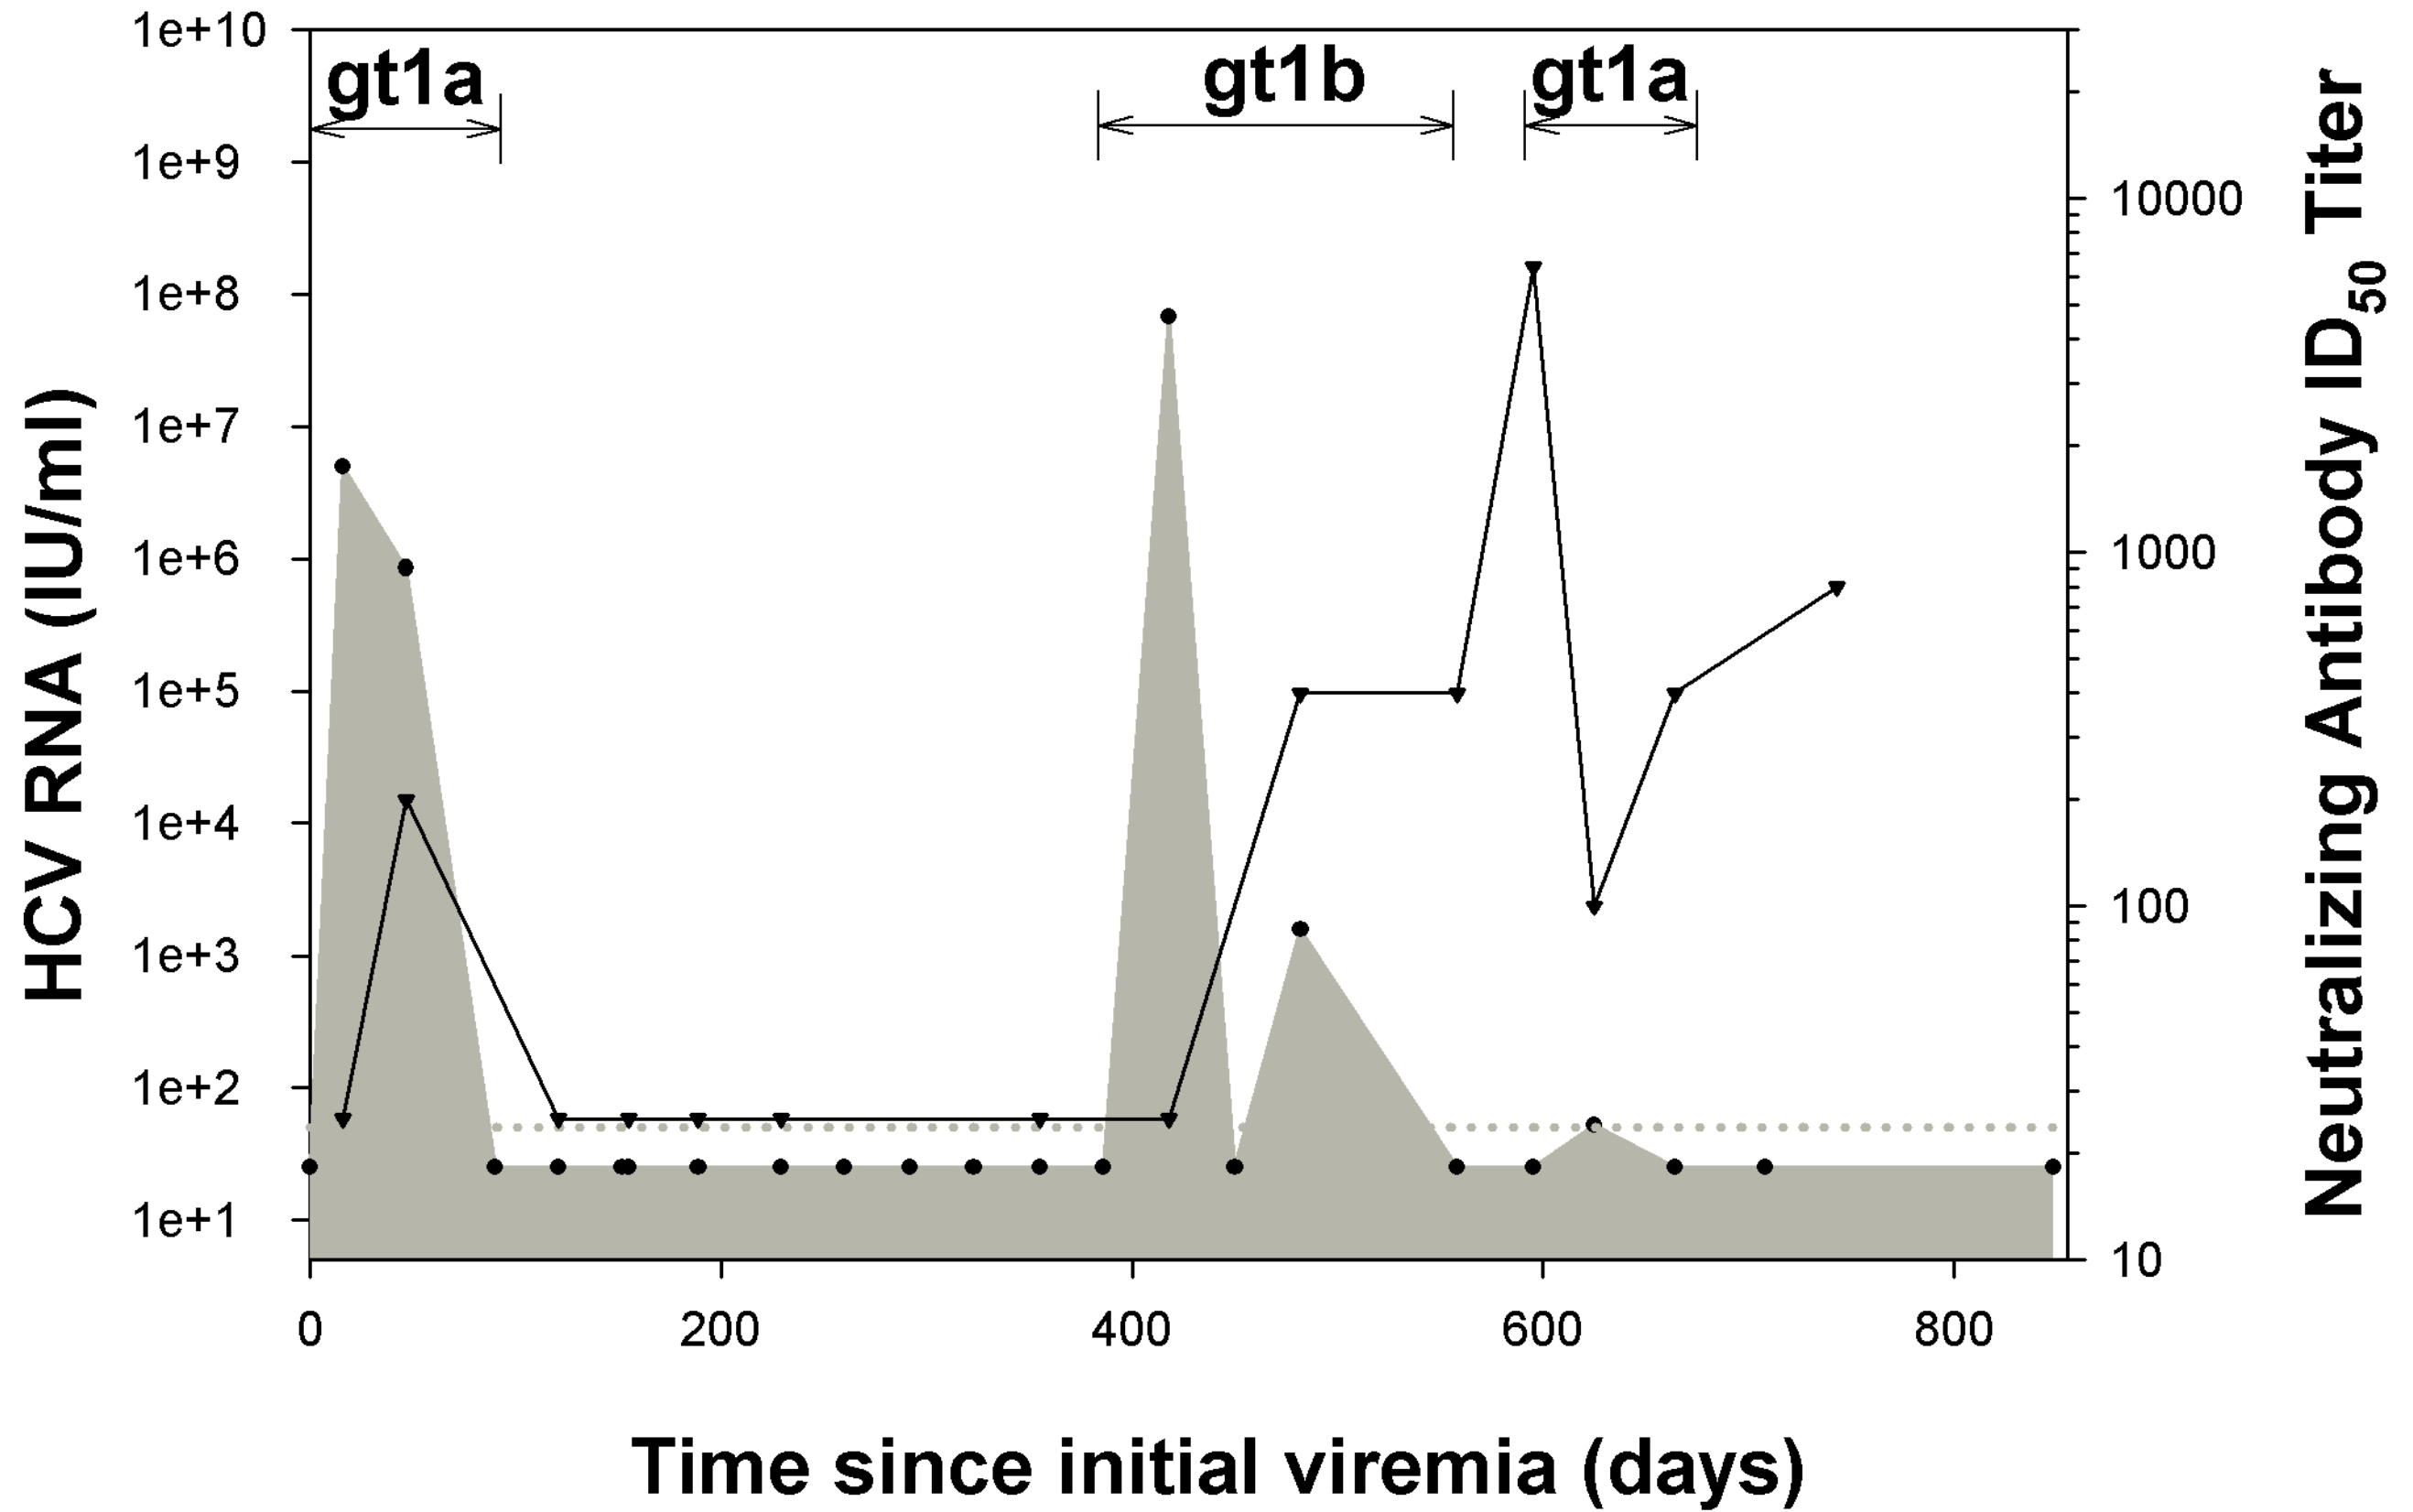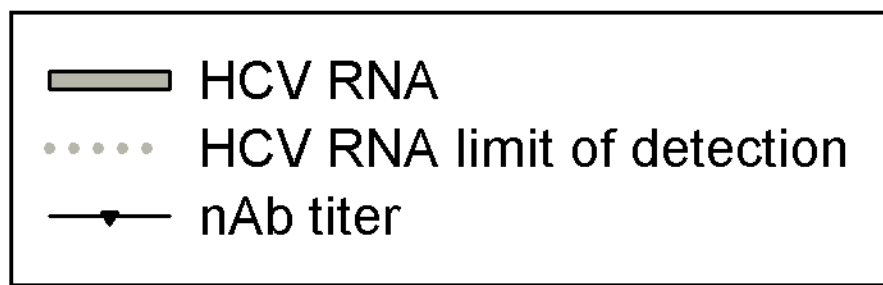

**Subject 19**

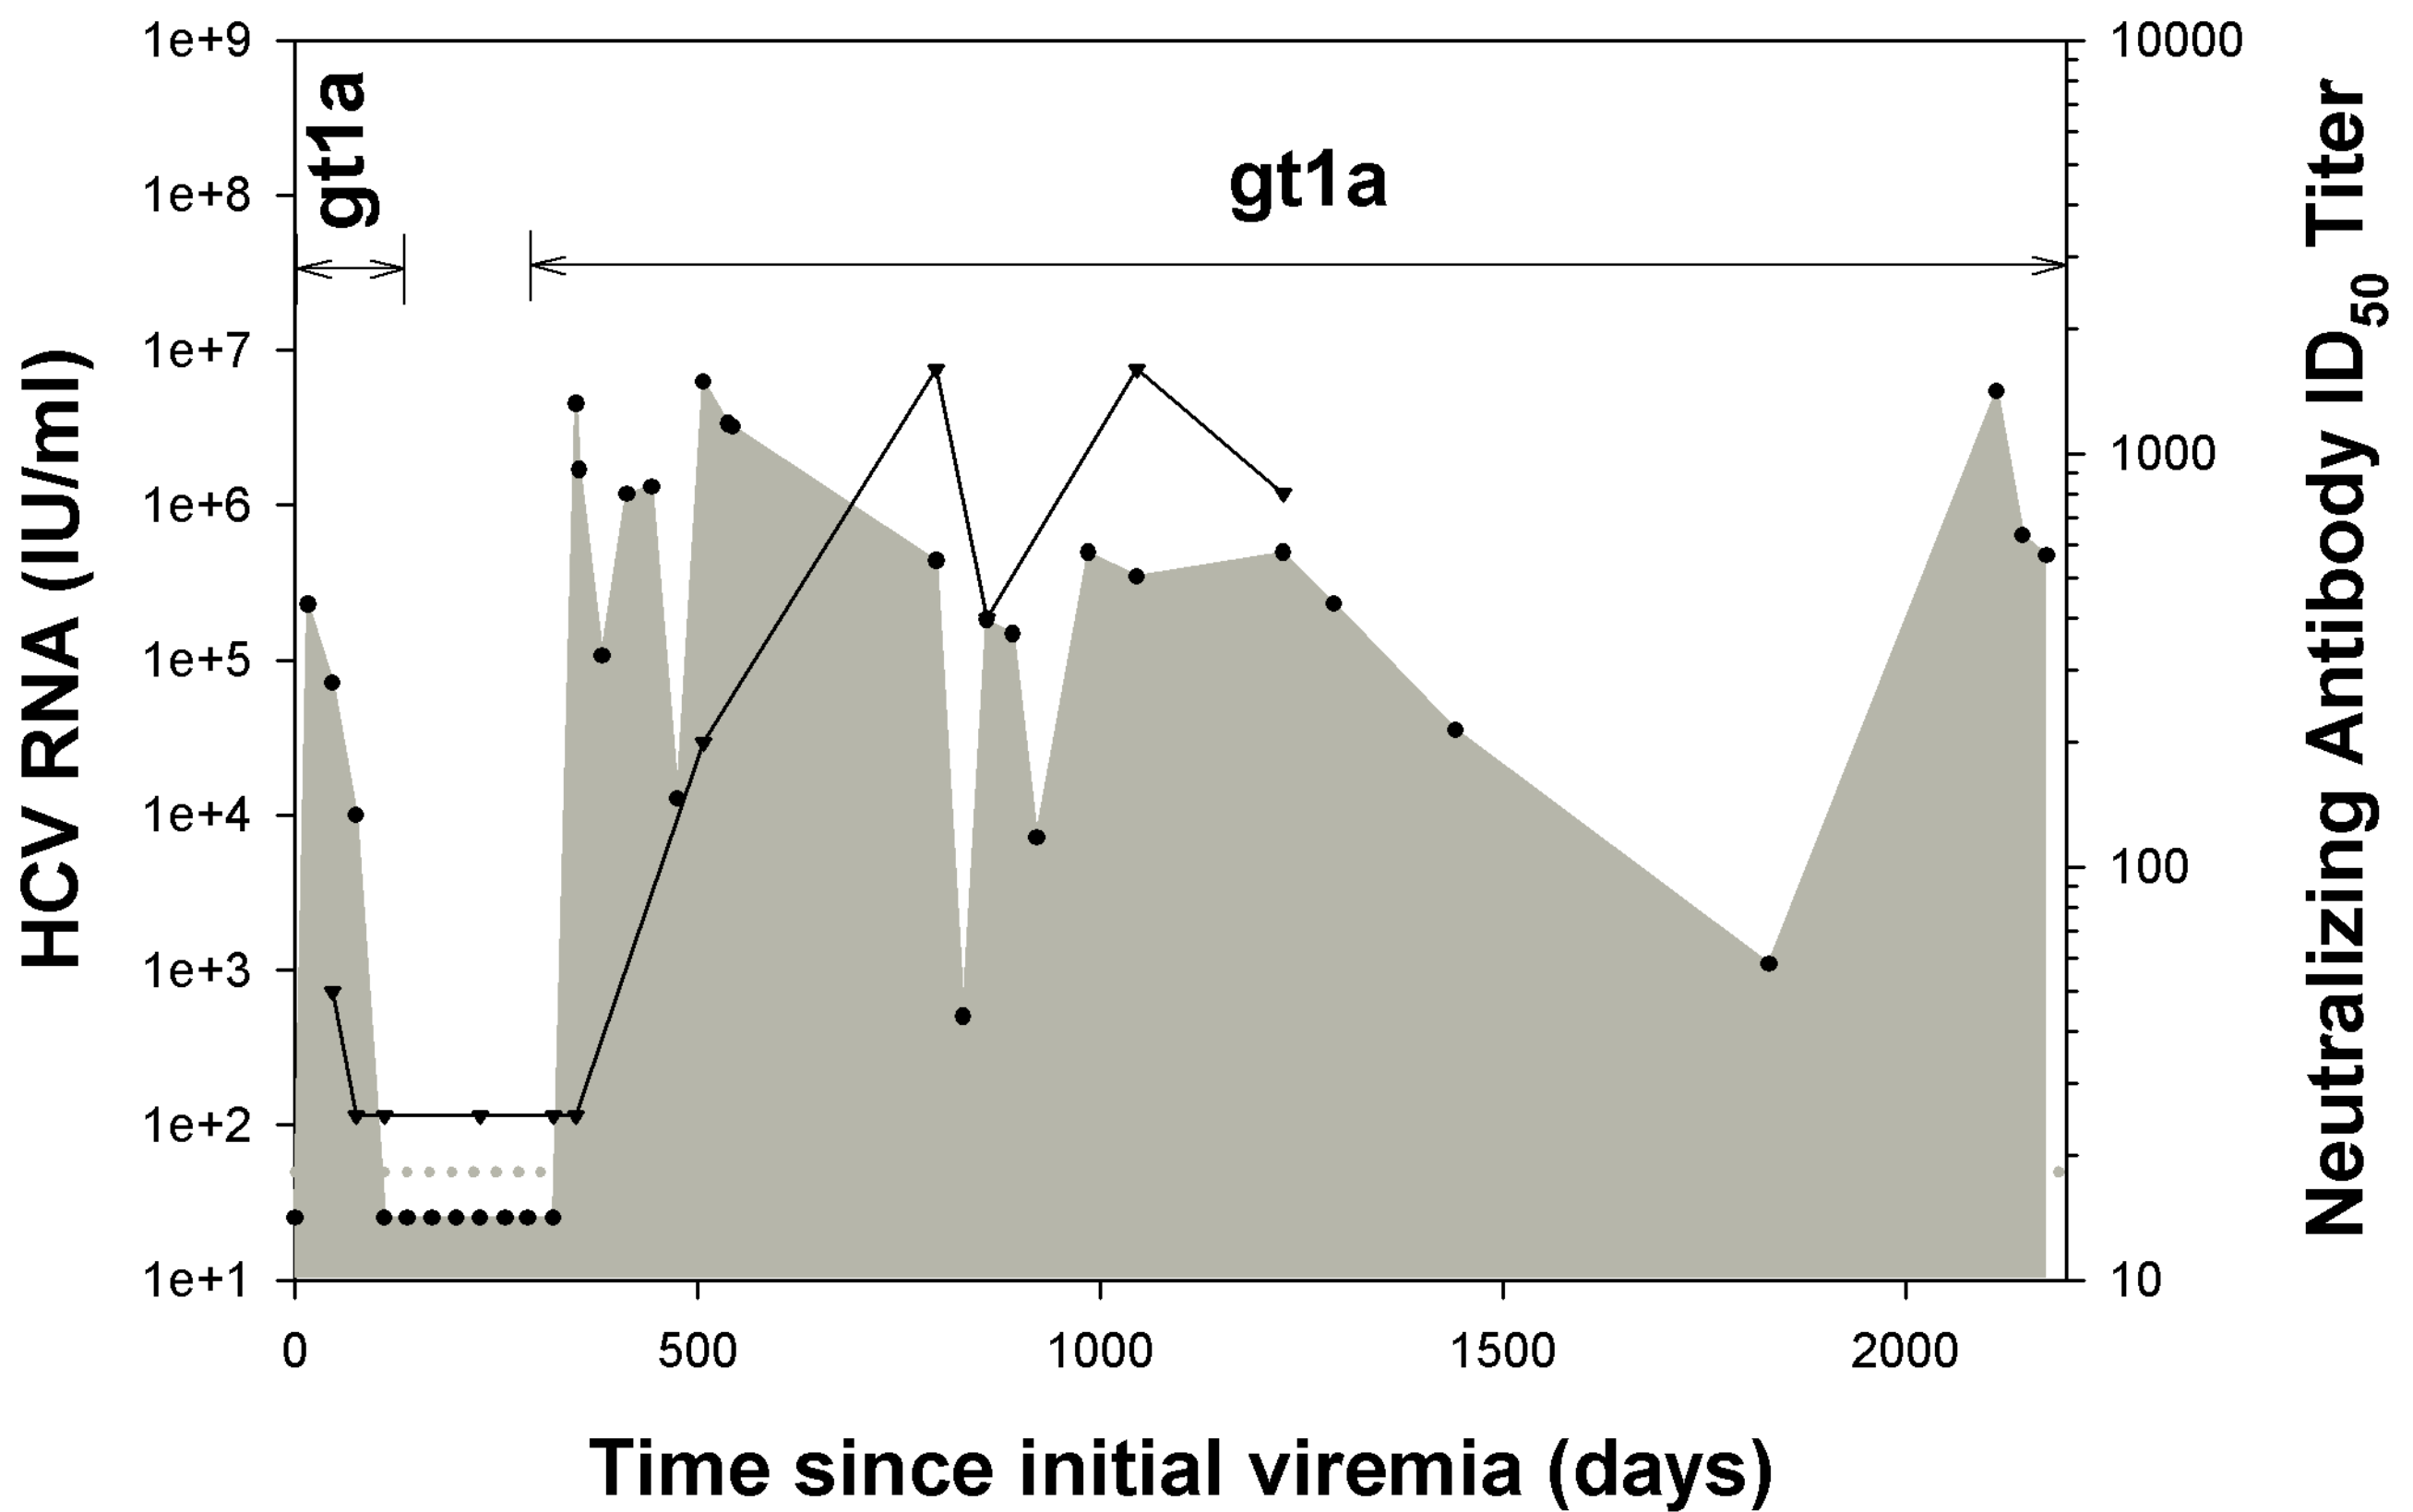

# Supplementary Figure 3

**A.**

|      |           |       |       |         |         |
|------|-----------|-------|-------|---------|---------|
| Core | E1        | E2    | P7    | NS2     | NS3     |
| *    | <b>XX</b> | * X * | X * * | X * * * | * * *   |
|      |           |       |       |         | **<br>* |

  

|      |      |      |    |   |   |
|------|------|------|----|---|---|
| NS4A |      |      |    |   |   |
| NS4B | NS5A | NS5B |    |   |   |
| *    | *    | * *  | ** | * | * |

**B.**

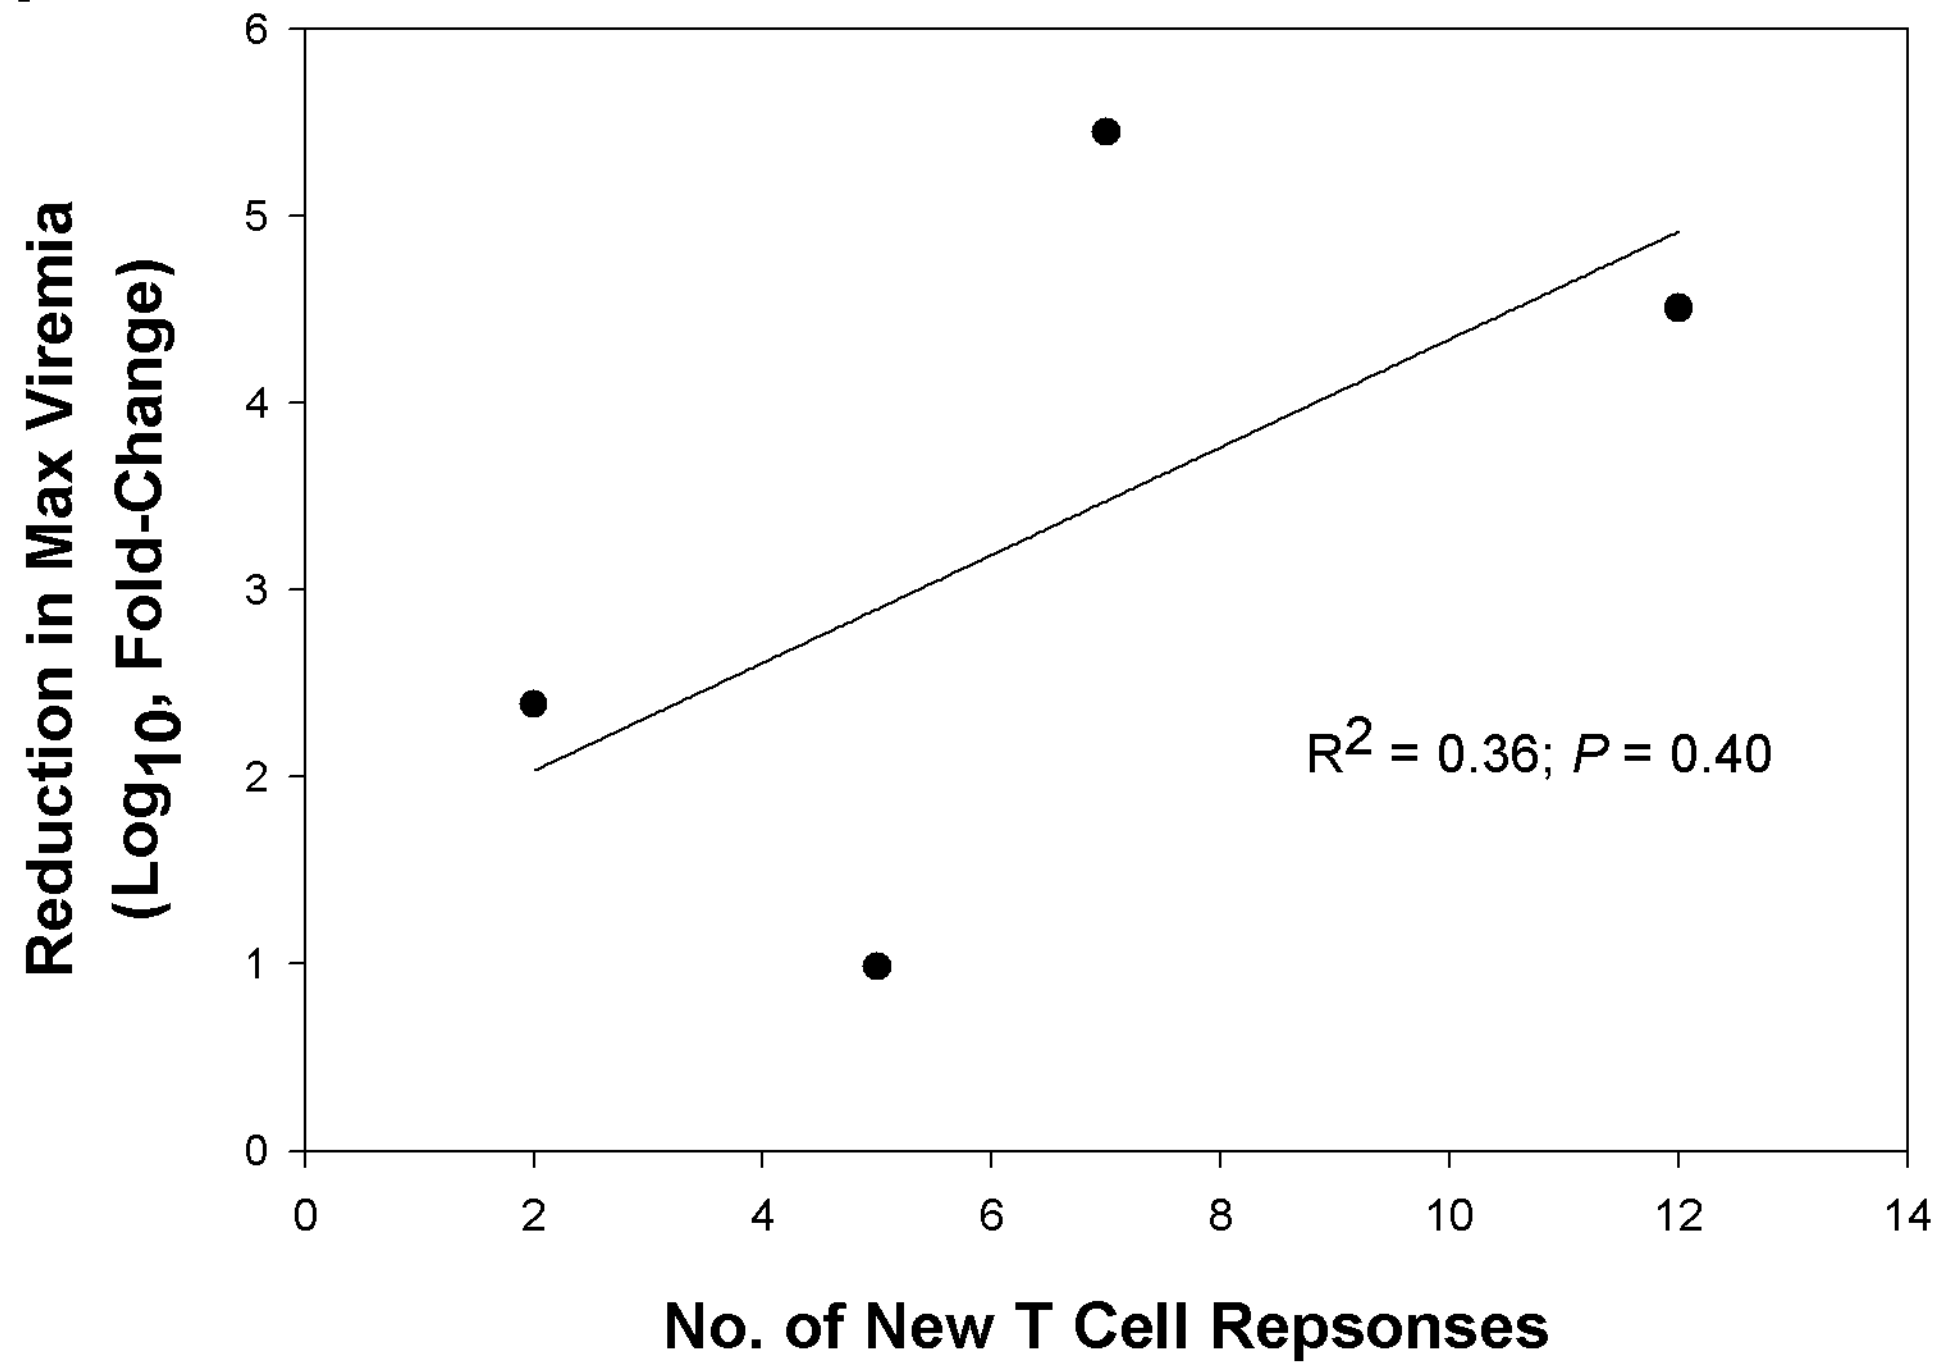

**C.**

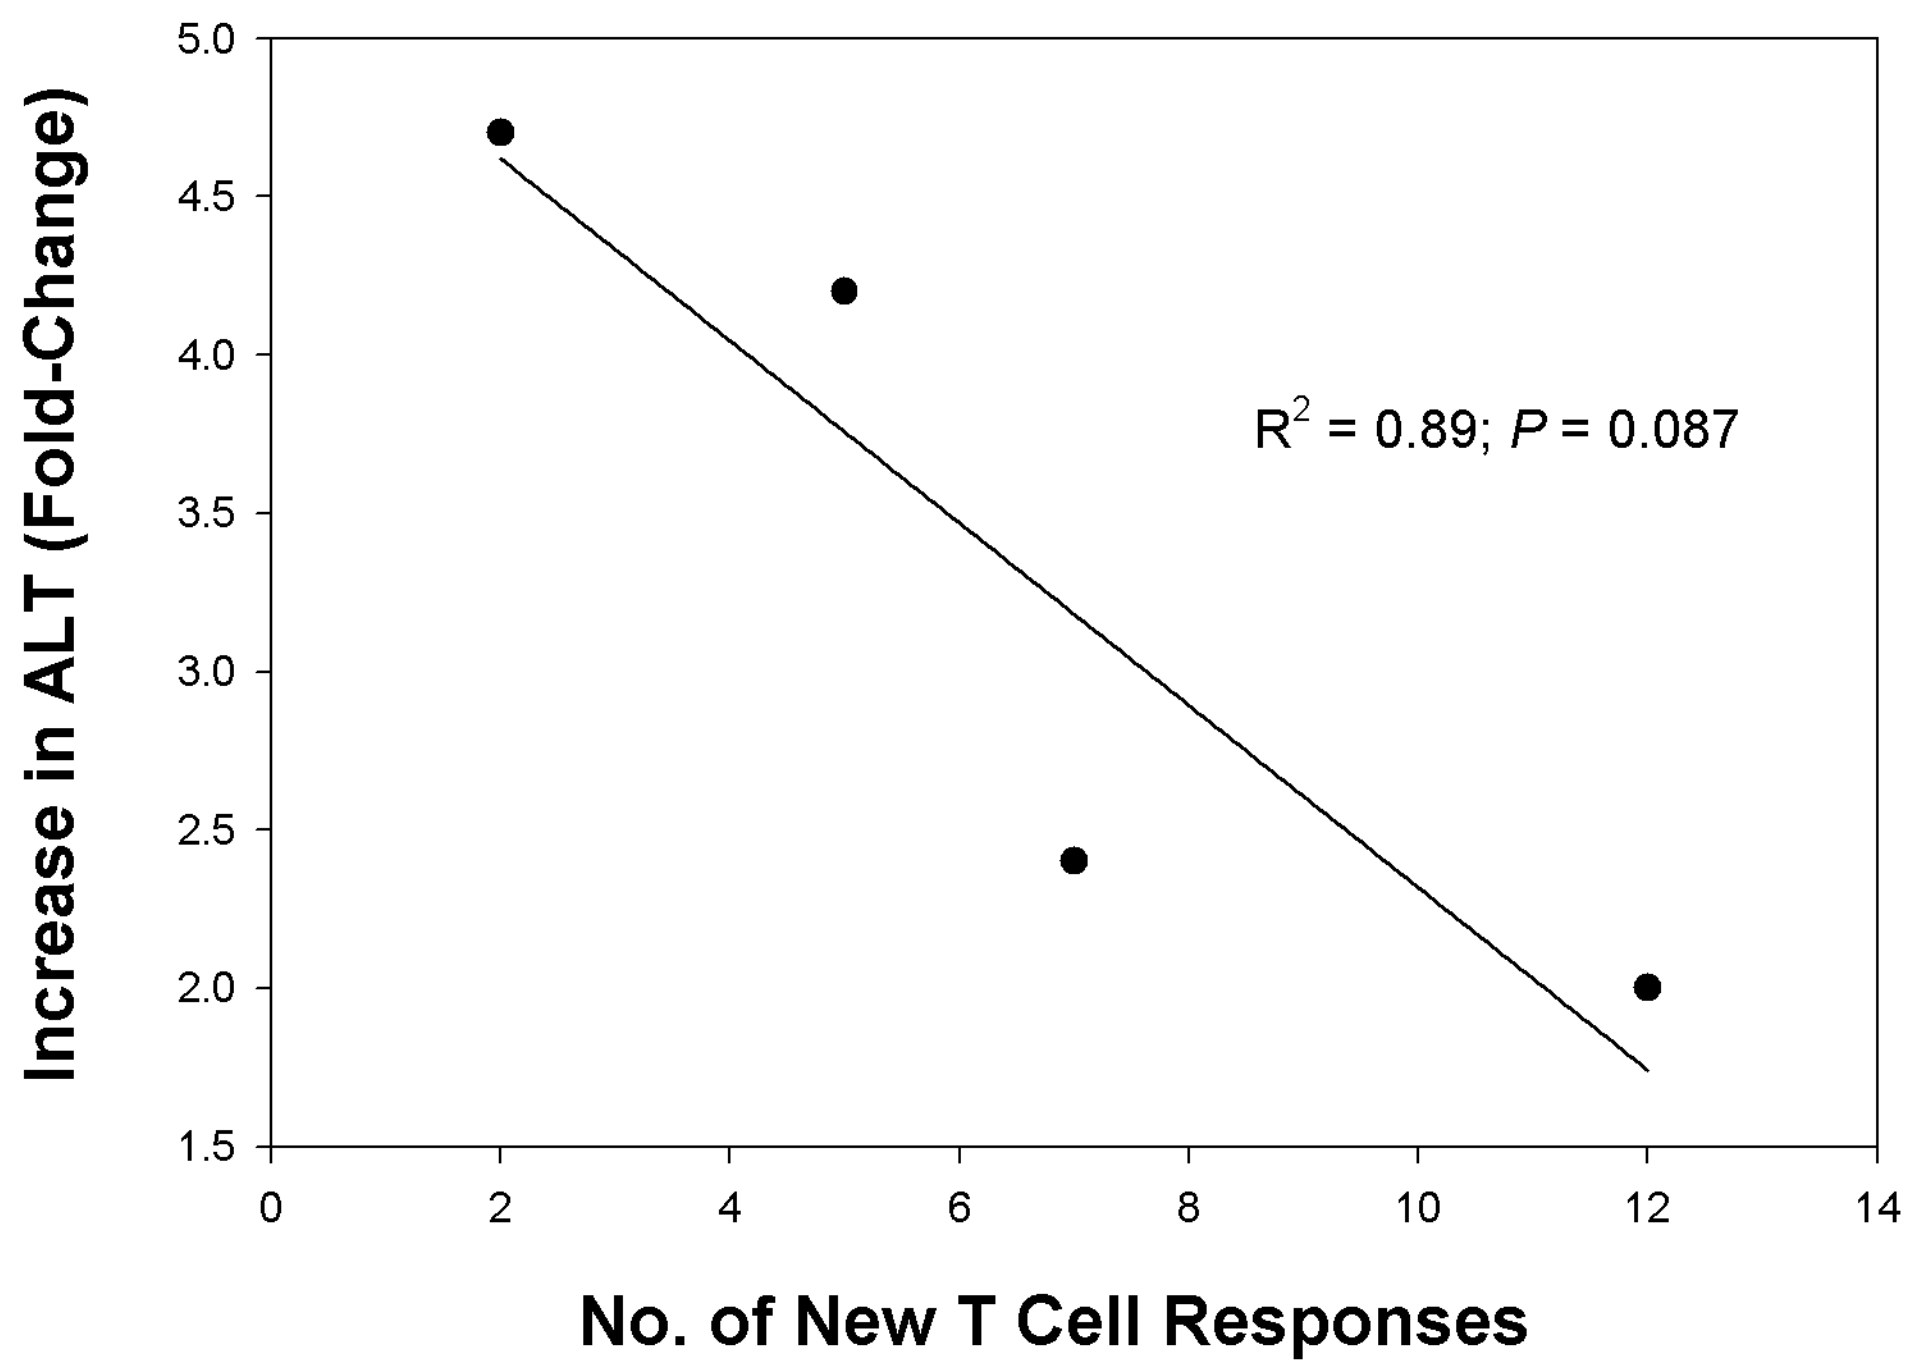

Supplement: NIHMS148283-supplement-01.pdf [file NIHMS148283-supplement-01.pdf]
